# Supplementary material for: Baicalin Targets HSP70/90 to Regulate PKR/PI3K/AKT/eNOS Signaling Pathways
Source: MDPI journal article supplement (doi:10.3390/molecules27041432), 2022-02-21
Supplement: s1 [file s1]

# **Baicalin targets HSP70/90 to regulate PKR/PI3K/AKT/eNOS**

## **signaling pathways**

Yinzhu Hou<sup>1,2,#</sup>, Zuqing Liang<sup>1,2,#</sup>, Luyu Qi<sup>1,2</sup>, Chao Tang<sup>1</sup>, Xingkai Liu<sup>1,2</sup>, Jilin Tang<sup>1,2</sup>, Yao Zhao<sup>1</sup>, Yanyan Zhang<sup>1</sup>, Tiantian Fang<sup>1</sup>, Qun Luo<sup>1,2\*</sup>, Shijun Wang<sup>3,\*</sup>, Fuyi Wang<sup>1,2,3\*</sup>

1. Beijing National Laboratory for Molecular Sciences; CAS Research/Education Center for Excellence in Molecular Sciences; CAS Key Laboratory of Analytical Chemistry for Living Biosystems; National Centre for Mass Spectrometry in Beijing; Institute of Chemistry, Chinese Academy of Sciences, Beijing, 100190, People's Republic of China;

2. College of Chemical Science, University of Chinese Academy of Sciences, Beijing 100049, People's Republic of China;

3. College of Traditional Chinese Medicine, Shandong University of Traditional Chinese Medicine, Jinan 250355, People's Republic of China;

\* Correspondence: [fuyi.wang@iccas.ac.cn](mailto:fuyi.wang@iccas.ac.cn) (FYW); [wsj@sducm.edu.cn](mailto:wsj@sducm.edu.cn) (SJW); [qunluo@iccas.ac.cn](mailto:qunluo@iccas.ac.cn) (QL)

## **Supplementary Materials**

**Figure S1 – S3**

**Table S1 – S3**

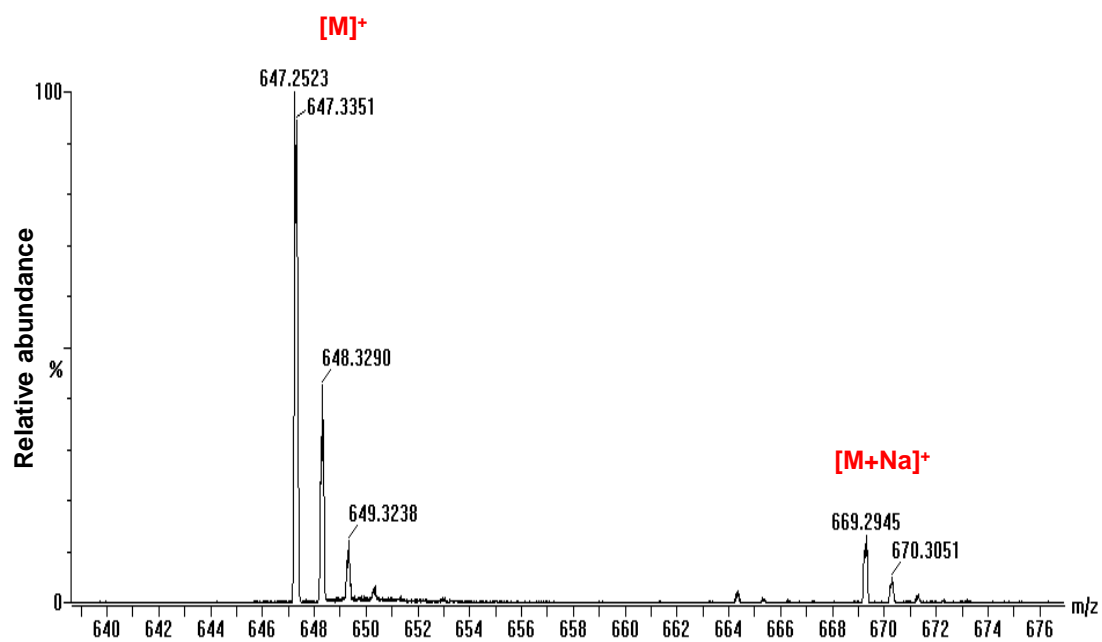

**Figure S1.** ESI-MS spectrum of azido baicalin (BCL-N<sub>3</sub>).

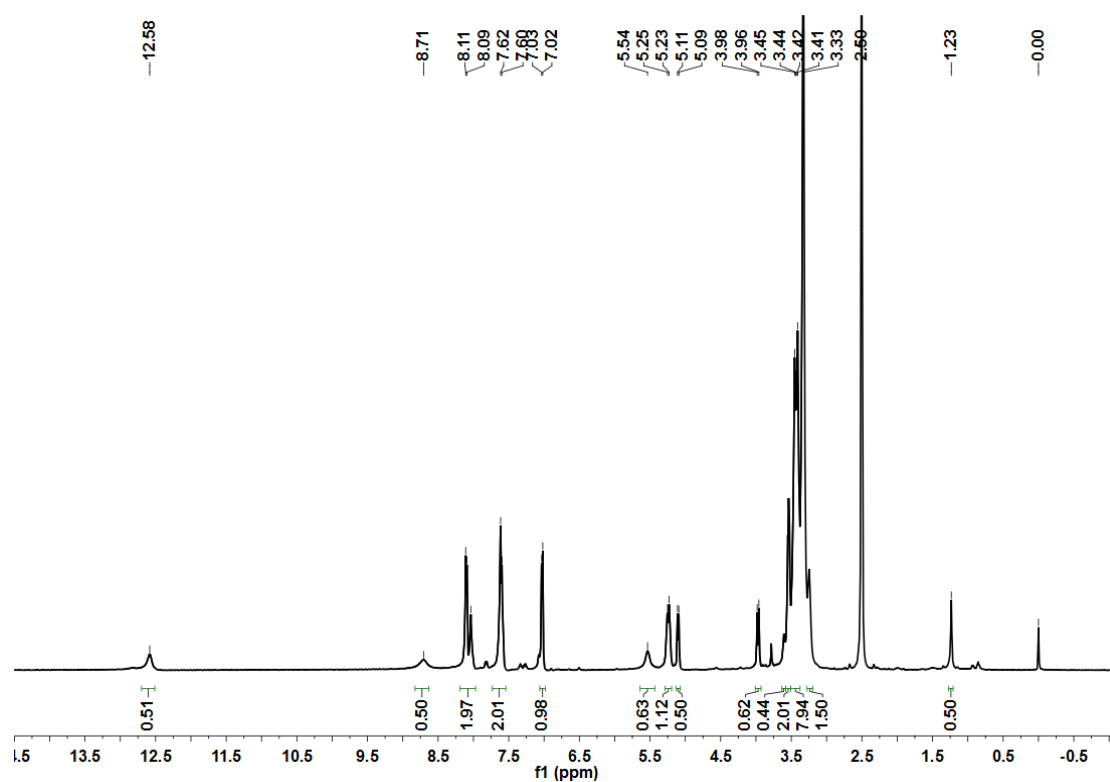

**Figure S2.**  $^1\text{H}$  NMR spectrum of azido baicalin (BCL- $\text{N}_3$ ) in  $\text{DMSO-d}_6$ .

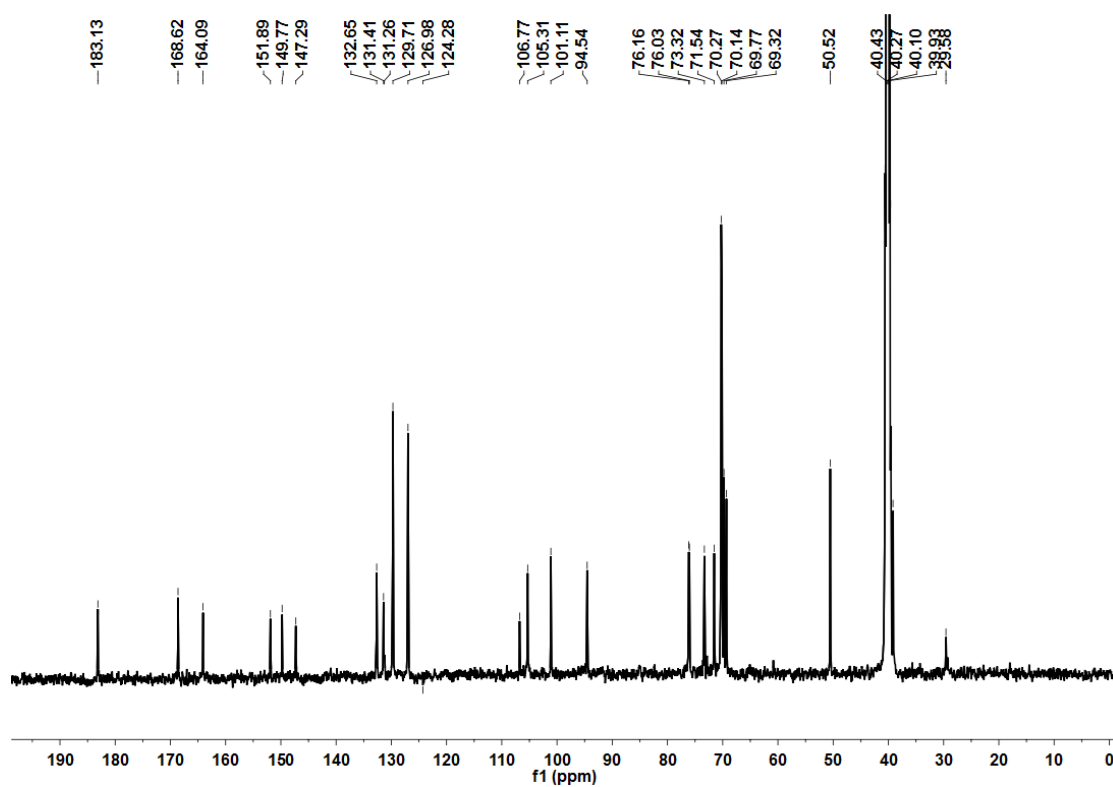

**Figure S3.** <sup>13</sup>C NMR spectrum of azido baicalin (BCL-N<sub>3</sub>) in DMSO-d<sub>6</sub>.

**Table S1.** MS quantitation data of target proteins of baicalin captured by BCL-N<sub>3</sub>@MNPs.

| prot_hit_num | prot_acc | prot_desc                                                                   | H <sub>Pos</sub> /<br>L <sub>Neg</sub> | prot_cover (%) | pep_exp_mz | pep_exp_mr | pep_exp_p_z | pep_calc_mr | pep_delta | pep_miss | pep_expect | pep_seq                                  | pep_var_mod                                                    |
|--------------|----------|-----------------------------------------------------------------------------|----------------------------------------|----------------|------------|------------|-------------|-------------|-----------|----------|------------|------------------------------------------|----------------------------------------------------------------|
| 1            | CKB      | Creatine kinase B-type<br>OS=Homo sapiens<br>OX=9606<br>GN=CKB<br>PE=1 SV=1 | 458.5±35                               | (1)31          | 811.4134   | 1620.8122  | 2           | 1619.836    | 0.9762    | 1        | 3.2        | MPFSNSHNALK<br>LR                        | Oxidation (M);<br>Acetyl:2H(3) (N-term);<br>Acetyl:2H(3) (K)   |
|              |          |                                                                             |                                        |                | 816.4394   | 1630.8643  | 2           | 1630.8605   | 0.0038    | 0        | 6.50E-05   | LAVEALSSLDG<br>DLAGR                     | Acetyl:2H(3) (N-term)                                          |
|              |          |                                                                             |                                        |                | 970.0232   | 1938.0318  | 2           | 1938.0291   | 0.0027    | 0        | 9.00E-05   | LGFSEVELVQM<br>VVDGVK                    | Acetyl:2H(3) (N-term);<br>Acetyl:2H(3) (K)                     |
|              |          |                                                                             |                                        |                | 978.0209   | 1954.0273  | 2           | 1954.024    | 0.0033    | 0        | 0.00032    | LGFSEVELVQM<br>VVDGVK                    | Oxidation (M);<br>Acetyl:2H(3) (N-term);<br>Acetyl:2H(3) (K)   |
|              |          |                                                                             |                                        |                | 1005.4887  | 2008.9628  | 2           | 2008.953    | 0.0099    | 0        | 1.10E-09   | GTGGVDTA AV<br>GGVFDVSNADR               | Acetyl:2H(3) (N-term)                                          |
|              |          |                                                                             |                                        |                | 849.411    | 2545.2112  | 3           | 2544.1974   | 1.0138    | 1        | 3.9        | LRFPAEDEF PDL<br>SAHNNHMAK               | Oxidation (M);<br>Acetyl:2H(3) (N-term);<br>Acetyl:2H(3) (K)   |
|              |          |                                                                             |                                        |                | 1237.5841  | 3709.7305  | 3           | 3708.8286   | 0.9019    | 0        | 0.26       | SMTEAEQQQLI<br>DDHFLFDKPVS<br>PLLLASGMAR | 2 Oxidation (M);<br>Acetyl:2H(3) (N-term);<br>Acetyl:2H(3) (K) |
|              |          |                                                                             |                                        | (2)23.6        | 816.4469   | 1630.8793  | 2           | 1630.8605   | 0.0188    | 0        | 8.70E-08   | LAVEALSSLDG<br>DLAGR                     | Acetyl:2H(3) (N-term)                                          |

|   |           |                                    |          |         |           |           |   |           |         |   |          |                                 |                                                              |
|---|-----------|------------------------------------|----------|---------|-----------|-----------|---|-----------|---------|---|----------|---------------------------------|--------------------------------------------------------------|
|   |           |                                    |          |         | 851.9448  | 1701.875  | 2 | 1701.8554 | 0.0196  | 0 | 0.0003   | TFLVWVNEEDH<br>LR               | Acetyl:2H(3) (N-term)                                        |
|   |           |                                    |          |         | 970.0322  | 1938.0498 | 2 | 1938.0291 | 0.0207  | 0 | 9.50E-06 | LGFSEVELVQM<br>VVDGVK           | Acetyl:2H(3) (N-term);<br>Acetyl:2H(3) (K)                   |
|   |           |                                    |          |         | 978.03    | 1954.0455 | 2 | 1954.024  | 0.0215  | 0 | 0.00012  | LGFSEVELVQM<br>VVDGVK           | Oxidation (M);<br>Acetyl:2H(3) (N-term);<br>Acetyl:2H(3) (K) |
|   |           |                                    |          |         | 1005.9947 | 2009.9748 | 2 | 2008.953  | 1.0219  | 0 | 2.10E-08 | GTGGVDTAAV<br>GGVFDVSNADR       | Acetyl:2H(3) (N-term)                                        |
|   |           |                                    |          |         | 854.3982  | 2560.1729 | 3 | 2559.1725 | 1.0004  | 0 | 2.2      | TDLNPDNLQGG<br>DDLDPNYVLSS<br>R | Acetyl (N-term)                                              |
|   |           |                                    |          | (3)19.7 | 816.4394  | 1630.8643 | 2 | 1630.8605 | 0.0037  | 0 | 1.90E-05 | LAVEALSSLDG<br>DLAGR            | Acetyl:2H(3) (N-term)                                        |
|   |           |                                    |          |         | 970.0253  | 1938.036  | 2 | 1938.0291 | 0.0069  | 0 | 6.90E-05 | LGFSEVELVQM<br>VVDGVK           | Acetyl:2H(3) (N-term);<br>Acetyl:2H(3) (K)                   |
|   |           |                                    |          |         | 978.0178  | 1954.0211 | 2 | 1954.024  | -0.0029 | 0 | 0.0019   | LGFSEVELVQM<br>VVDGVK           | Oxidation (M);<br>Acetyl:2H(3) (N-term);<br>Acetyl:2H(3) (K) |
|   |           |                                    |          |         | 1005.4885 | 2008.9624 | 2 | 2008.953  | 0.0095  | 0 | 4.50E-10 | GTGGVDTAAV<br>GGVFDVSNADR       | Acetyl:2H(3) (N-term)                                        |
|   |           |                                    |          |         | 847.0812  | 2538.2219 | 3 | 2538.1597 | 0.0621  | 1 | 2.3      | LRFPAEDEFDDL<br>SAHNNHMAK       | Oxidation (M); Acetyl<br>(N-term); Acetyl (K)                |
| 2 | YWH<br>AQ | 14-3-3<br>protein theta<br>OS=Homo | 280.4±72 | (1)16.3 | 802.4851  | 801.4778  | 1 | 801.4649  | 0.013   | 1 | 0.63     | NVVGGR                          | Acetyl:2H(3) (N-term)                                        |

|                                                 |         |          |           |   |           |         |   |          |                    |                                            |
|-------------------------------------------------|---------|----------|-----------|---|-----------|---------|---|----------|--------------------|--------------------------------------------|
| sapiens<br>OX=9606<br>GN=YWHA<br>Q PE=1<br>SV=1 |         |          |           |   |           |         |   |          |                    |                                            |
|                                                 |         | 585.2965 | 1168.5785 | 2 | 1168.5738 | 0.0047  | 0 | 0.012    | EMQPTHPIR          | Oxidation (M);<br>Acetyl:2H(3) (N-term)    |
|                                                 |         | 617.8495 | 1233.6844 | 2 | 1233.683  | 0.0014  | 0 | 7.80E-06 | DSTLIMQLLR         | Acetyl:2H(3) (N-term)                      |
|                                                 |         | 625.842  | 1249.6695 | 2 | 1249.6779 | -0.0084 | 0 | 1.1      | DSTLIMQLLR         | Oxidation (M);<br>Acetyl:2H(3) (N-term)    |
|                                                 |         | 789.3792 | 1576.7439 | 2 | 1576.7408 | 0.0031  | 0 | 7.90E-07 | AVTEQGAELSN<br>EER | Acetyl:2H(3) (N-term)                      |
|                                                 | (2)20   | 496.2696 | 990.5246  | 2 | 990.5386  | -0.0139 | 0 | 2.7      | NLLSVAYK           | Acetyl (N-term); Acetyl<br>(K)             |
|                                                 |         | 497.2952 | 992.5758  | 2 | 992.5661  | 0.0098  | 0 | 0.0024   | VISSIEQK           | Acetyl:2H(3) (N-term);<br>Acetyl:2H(3) (K) |
|                                                 |         | 585.7867 | 1169.5588 | 2 | 1168.5738 | 0.985   | 0 | 0.089    | EMQPTHPIR          | Oxidation (M);<br>Acetyl:2H(3) (N-term)    |
|                                                 |         | 617.8544 | 1233.6943 | 2 | 1233.683  | 0.0113  | 0 | 7.30E-05 | DSTLIMQLLR         | Acetyl:2H(3) (N-term)                      |
|                                                 |         | 625.8528 | 1249.6909 | 2 | 1249.6779 | 0.013   | 0 | 6.50E-05 | DSTLIMQLLR         | Oxidation (M);<br>Acetyl:2H(3) (N-term)    |
|                                                 |         | 789.3868 | 1576.7589 | 2 | 1576.7408 | 0.0182  | 0 | 7.30E-07 | AVTEQGAELSN<br>EER | Acetyl:2H(3) (N-term)                      |
|                                                 | (3)16.7 | 585.7809 | 1169.5473 | 2 | 1168.5738 | 0.9735  | 0 | 0.33     | EMQPTHPIR          | Oxidation (M);<br>Acetyl:2H(3) (N-term)    |
|                                                 |         | 617.8491 | 1233.6836 | 2 | 1233.683  | 0.0006  | 0 | 8.10E-06 | DSTLIMQLLR         | Acetyl:2H(3) (N-term)                      |

|   |            |                                                                                                   |           |         |          |           |   |           |         |   |          |                            |                                                 |
|---|------------|---------------------------------------------------------------------------------------------------|-----------|---------|----------|-----------|---|-----------|---------|---|----------|----------------------------|-------------------------------------------------|
|   |            |                                                                                                   |           |         | 625.8468 | 1249.6791 | 2 | 1249.6779 | 0.0012  | 0 | 5.40E-06 | DSTLMQLLR                  | Oxidation (M);<br>Acetyl:2H(3) (N-term)         |
|   |            |                                                                                                   |           |         | 789.3806 | 1576.7467 | 2 | 1576.7408 | 0.0059  | 0 | 1.50E-08 | AVTEQGAELSN<br>EER         | Acetyl:2H(3) (N-term)                           |
|   |            |                                                                                                   |           |         | 836.0863 | 2505.2371 | 3 | 2504.2394 | 0.9977  | 1 | 2.8      | AVTEQGAELSN<br>EERNLLSVAYK | Acetyl (N-term); Acetyl<br>(K)                  |
| 3 | HSPA1<br>A | Heat shock 70<br>kDa protein<br>1A<br>OS=Homo<br>sapiens<br>OX=9606<br>GN=HSPA1<br>A PE=1<br>SV=1 | 106.4±8.7 | (1)29.8 | 629.8005 | 1257.5864 | 2 | 1257.6089 | -0.0224 | 1 | 2.1      | SAVEDEGLK GK               | Acetyl (N-term); 2<br>Acetyl (K)                |
|   |            |                                                                                                   |           |         | 634.7858 | 1267.5571 | 2 | 1266.5802 | 0.9769  | 1 | 0.48     | MVQEAEKYK                  | Oxidation (M); Acetyl<br>(N-term); 2 Acetyl (K) |
|   |            |                                                                                                   |           |         | 637.3337 | 1272.6529 | 2 | 1272.6501 | 0.0028  | 0 | 4.30E-06 | VEIANDQG NR                | Acetyl:2H(3) (N-term)                           |
|   |            |                                                                                                   |           |         | 755.9271 | 1509.8396 | 2 | 1509.8343 | 0.0053  | 0 | 1.80E-05 | AQIHDLVLVGG<br>STR         | Acetyl:2H(3) (N-term)                           |
|   |            |                                                                                                   |           |         | 766.8718 | 1531.7291 | 2 | 1531.7234 | 0.0057  | 0 | 0.00031  | TTPSYVAFTDT<br>ER          | Acetyl:2H(3) (N-term)                           |
|   |            |                                                                                                   |           |         | 856.0073 | 1710      | 2 | 1708.9472 | 1.0528  | 1 | 2.5      | QATKDAGVIAG<br>LNVLR       | Acetyl (N-term); Acetyl<br>(K)                  |
|   |            |                                                                                                   |           |         | 861.3959 | 1720.7773 | 2 | 1719.7528 | 1.0245  | 0 | 0.36     | ATAGDTHLGGE<br>DFDNR       | Acetyl:2H(3) (N-term)                           |



|       |           |           |   |           |         |   |         |                                          |                                                              |
|-------|-----------|-----------|---|-----------|---------|---|---------|------------------------------------------|--------------------------------------------------------------|
|       | 781.6851  | 2342.0335 | 3 | 2341.0784 | 0.9552  | 1 | 0.42    | NALESYAFNMK<br>SAVEDEGLK                 | Acetyl (N-term); 2<br>Acetyl (K)                             |
|       | 944.8062  | 2831.3966 | 3 | 2830.3853 | 1.0113  | 0 | 0.00024 | QTQIFTTYSN<br>QPGVLIQVYEG<br>ER          | Acetyl:2H(3) (N-term)                                        |
|       | 1016.5151 | 3046.5235 | 3 | 3045.5163 | 1.0072  | 0 | 0.73    | EIAEAYLGYPV<br>TNAVITVPAYF<br>NDSQR      | Acetyl:2H(3) (N-term)                                        |
|       | 1091.2748 | 3270.8026 | 3 | 3269.7951 | 1.0075  | 0 | 0.0081  | SENVQDLLLLD<br>VAPLSLGLETA<br>GGVMTALIK  | Acetyl:2H(3) (N-term);<br>Acetyl:2H(3) (K)                   |
|       | 1096.6017 | 3286.7833 | 3 | 3285.79   | 0.9933  | 0 | 0.014   | SENVQDLLLLD<br>VAPLSLGLETA<br>GGVMTALIK  | Oxidation (M);<br>Acetyl:2H(3) (N-term);<br>Acetyl:2H(3) (K) |
|       | 1146.2887 | 3435.8443 | 3 | 3435.8535 | -0.0092 | 1 | 0.61    | SENVQDLLLLD<br>VAPLSLGLETA<br>GGVMTALIKR | Oxidation (M); Acetyl<br>(N-term); Acetyl (K)                |
|       | 1206.9266 | 3617.758  | 3 | 3616.8168 | 0.9412  | 1 | 0.061   | NSTIPTKQTQIF<br>TTYSDNQPGVL<br>IQVYEGER  | Acetyl:2H(3) (N-term);<br>Acetyl:2H(3) (K)                   |
| (2)24 | 622.3536  | 1242.6927 | 2 | 1241.7171 | 0.9756  | 0 | 0.038   | DAGVIAGLNVL<br>R                         | Acetyl:2H(3) (N-term)                                        |
|       | 637.339   | 1272.6634 | 2 | 1272.6501 | 0.0133  | 0 | 0.00028 | VEIANDQGNR                               | Acetyl:2H(3) (N-term)                                        |
|       | 755.933   | 1509.8514 | 2 | 1509.8343 | 0.0171  | 0 | 0.00078 | AQIHDLVLVGG<br>STR                       | Acetyl:2H(3) (N-term)                                        |

|         |           |           |   |           |         |   |          |                                          |                                               |
|---------|-----------|-----------|---|-----------|---------|---|----------|------------------------------------------|-----------------------------------------------|
|         | 766.8774  | 1531.7403 | 2 | 1531.7234 | 0.0169  | 0 | 0.0019   | TTPSYVAFTDT<br>ER                        | Acetyl:2H(3) (N-term)                         |
|         | 568.9649  | 1703.8729 | 3 | 1703.8599 | 0.013   | 0 | 2.6      | AFYPEEISSMVL<br>TK                       | Acetyl:2H(3) (N-term);<br>Acetyl:2H(3) (K)    |
|         | 853.4172  | 1704.8199 | 2 | 1703.8599 | 0.9601  | 0 | 2.6      | AFYPEEISSMVL<br>TK                       | Acetyl:2H(3) (N-term);<br>Acetyl:2H(3) (K)    |
|         | 1016.5246 | 3046.552  | 3 | 3045.5163 | 1.0357  | 0 | 1.80E-05 | EIAEAYLGYPV<br>TNAVITVPAYF<br>NDSQR      | Acetyl:2H(3) (N-term)                         |
|         | 628.8955  | 3139.4413 | 5 | 3138.5081 | 0.9332  | 0 | 2.1      | ELEQVCNPIISG<br>LYQGAGGPGPG<br>GFGAQGPK  | Acetyl (N-term); Acetyl<br>(K)                |
|         | 1090.95   | 3269.8282 | 3 | 3269.7951 | 0.0331  | 0 | 8.40E-05 | SENVQDLLLLD<br>VAPLSLGLETA<br>GGVMTALIK  | Acetyl:2H(3) (N-term);<br>Acetyl:2H(3) (K)    |
|         | 859.9753  | 3435.8721 | 4 | 3435.8535 | 0.0186  | 1 | 0.14     | SENVQDLLLLD<br>VAPLSLGLETA<br>GGVMTALIKR | Oxidation (M); Acetyl<br>(N-term); Acetyl (K) |
| (3)35.6 | 421.2555  | 840.4964  | 2 | 839.4699  | 1.0265  | 1 | 1.7      | STGKANK                                  | Acetyl:2H(3) (N-term); 2<br>Acetyl:2H(3) (K)  |
|         | 577.8058  | 1153.5971 | 2 | 1153.5959 | 0.0012  | 0 | 0.21     | LLQDFFNGR                                | Acetyl:2H(3) (N-term)                         |
|         | 620.3688  | 1238.7231 | 2 | 1238.6983 | 0.0248  | 0 | 20       | DAGVIAGLNVL<br>R                         | Acetyl (N-term)                               |
|         | 629.8014  | 1257.5882 | 2 | 1257.6089 | -0.0207 | 1 | 1.3      | SAVEDEGLKGGK                             | Acetyl (N-term); 2<br>Acetyl (K)              |
|         | 637.3339  | 1272.6533 | 2 | 1272.6501 | 0.0032  | 0 | 0.00026  | VEIANDQGNR                               | Acetyl:2H(3) (N-term)                         |

|  |           |           |   |           |         |   |          |                                        |                                                                |
|--|-----------|-----------|---|-----------|---------|---|----------|----------------------------------------|----------------------------------------------------------------|
|  | 638.8306  | 1275.6466 | 2 | 1275.6367 | 0.0099  | 1 | 4.5      | MVQEAEKYK                              | Oxidation (M);<br>Acetyl:2H(3) (N-term); 2<br>Acetyl:2H(3) (K) |
|  | 662.3074  | 1322.6003 | 2 | 1321.586  | 1.0143  | 0 | 2.4      | FGDPVVQSDM<br>K                        | Oxidation (M); Acetyl<br>(N-term); Acetyl (K)                  |
|  | 743.8915  | 1485.7684 | 2 | 1484.7531 | 1.0153  | 1 | 3        | KFGDPVVQSD<br>MK                       | Acetyl:2H(3) (N-term); 2<br>Acetyl:2H(3) (K)                   |
|  | 755.9268  | 1509.8391 | 2 | 1509.8343 | 0.0049  | 0 | 2.90E-05 | AQIHDLVLVGG<br>STR                     | Acetyl:2H(3) (N-term)                                          |
|  | 766.8722  | 1531.7298 | 2 | 1531.7234 | 0.0064  | 0 | 0.0014   | TTPSYVAFTDT<br>ER                      | Acetyl:2H(3) (N-term)                                          |
|  | 861.3857  | 1720.7569 | 2 | 1719.7528 | 1.0041  | 0 | 0.39     | ATAGDTHLGGE<br>DFDNR                   | Acetyl:2H(3) (N-term)                                          |
|  | 921.7645  | 2762.2716 | 3 | 2762.3408 | -0.0692 | 1 | 1.8      | MAKAAAIGIDL<br>GTTYSCVGVFQ<br>HGK      | Acetyl (Protein N-term);<br>Acetyl (N-term); 2<br>Acetyl (K)   |
|  | 944.4719  | 2830.394  | 3 | 2830.3853 | 0.0087  | 0 | 7.90E-07 | QTQIFTTYSN<br>QPGVLIQVYEG<br>ER        | Acetyl:2H(3) (N-term)                                          |
|  | 1016.1791 | 3045.5155 | 3 | 3045.5163 | -0.0008 | 0 | 0.00026  | EIAEAYLGYPV<br>TNAVITVPAYF<br>NDSQR    | Acetyl:2H(3) (N-term)                                          |
|  | 1090.9405 | 3269.7997 | 3 | 3269.7951 | 0.0046  | 0 | 0.021    | SENVQDLLLD<br>VAPLSLGLETA<br>GGVMTALIK | Acetyl:2H(3) (N-term);<br>Acetyl:2H(3) (K)                     |

|   |           |                                                                                                                                                   |                        |         |           |           |   |           |         |   |          |                                         |                                                                |
|---|-----------|---------------------------------------------------------------------------------------------------------------------------------------------------|------------------------|---------|-----------|-----------|---|-----------|---------|---|----------|-----------------------------------------|----------------------------------------------------------------|
|   |           |                                                                                                                                                   |                        |         | 1206.5901 | 3616.7485 | 3 | 3616.8168 | -0.0683 | 1 | 0.0094   | NSTIPTKQTQIF<br>TTYSDNQPGVL<br>IQVYEGER | Acetyl:2H(3) (N-term);<br>Acetyl:2H(3) (K)                     |
| 4 | C1QB<br>P | Complement<br>component 1<br>Q<br>subcomponen<br>t-binding<br>protein,<br>mitochondrial<br>OS=Homo<br>sapiens<br>OX=9606<br>GN=C1QBP<br>PE=1 SV=1 | 150.42±4<br>9<br>(n=2) | (1)43.3 | 482.7887  | 963.5629  | 2 | 963.5501  | 0.0128  | 0 | 2.4      | QLLQPAPR                                | Acetyl (N-term)                                                |
|   |           |                                                                                                                                                   |                        |         | 864.9236  | 1727.8327 | 2 | 1726.7991 | 1.0337  | 0 | 0.98     | MSGGWELELN<br>GTEAK                     | Oxidation (M);<br>Acetyl:2H(3) (N-term);<br>Acetyl:2H(3) (K)   |
|   |           |                                                                                                                                                   |                        |         | 894.4538  | 1786.893  | 2 | 1786.8896 | 0.0035  | 1 | 4.10E-07 | AFVDFLSDEIKE<br>ER                      | Acetyl:2H(3) (N-term);<br>Acetyl:2H(3) (K)                     |
|   |           |                                                                                                                                                   |                        |         | 1107.0314 | 2212.0482 | 2 | 2211.1079 | 0.9403  | 1 | 0.69     | TLPKMSGGWEL<br>ELNGTEAK                 | Oxidation (M);<br>Acetyl:2H(3) (N-term); 2<br>Acetyl:2H(3) (K) |
|   |           |                                                                                                                                                   |                        |         | 1472.218  | 2942.4214 | 2 | 2941.4081 | 1.0134  | 1 | 0.86     | VEEQEPELTSTP<br>NFVVEVIKNDD<br>GK       | Acetyl (N-term); 2<br>Acetyl (K)                               |

|         |           |           |   |           |        |   |          |                                        |                                              |
|---------|-----------|-----------|---|-----------|--------|---|----------|----------------------------------------|----------------------------------------------|
|         |           |           |   |           |        |   |          | DTNYTLNTDSL                            |                                              |
|         | 1582.73   | 3163.4454 | 2 | 3162.432  | 1.0135 | 0 | 8.10E-09 | DWALYDHLMD                             | Acetyl:2H(3) (N-term)                        |
|         |           |           |   |           |        |   |          | FLADR                                  |                                              |
|         | 1060.8286 | 3179.464  | 3 | 3178.4269 | 1.0371 | 0 | 0.76     | DTNYTLNTDSL<br>DWALYDHLMD<br>FLADR     | Oxidation (M);<br>Acetyl:2H(3) (N-term)      |
|         | 1177.2522 | 3528.7348 | 3 | 3528.7306 | 0.0041 | 0 | 0.014    | GVDNTFADELV<br>ELSTALEHQEYI<br>TFLEDLK | Acetyl:2H(3) (N-term);<br>Acetyl:2H(3) (K)   |
| (2)35.8 | 789.1296  | 2364.3669 | 3 | 2363.326  | 1.0409 | 1 | 2.2      | QLQPAPRLCT<br>RPFGLLSVR                | Acetyl (N-term)                              |
|         | 984.8254  | 2951.4545 | 3 | 2950.4645 | 0.99   | 1 | 1.5      | VEEQEPELTSTP<br>NFVVEVIKNDD<br>GK      | Acetyl:2H(3) (N-term); 2<br>Acetyl:2H(3) (K) |
|         | 1055.1622 | 3162.4648 | 3 | 3162.432  | 0.0328 | 0 | 4.20E-07 | DTNYTLNTDSL<br>DWALYDHLMD<br>FLADR     | Acetyl:2H(3) (N-term)                        |
|         | 1582.7424 | 3163.4702 | 2 | 3162.432  | 1.0383 | 0 | 1.50E-09 | DTNYTLNTDSL<br>DWALYDHLMD<br>FLADR     | Acetyl:2H(3) (N-term)                        |
|         | 1060.495  | 3178.4632 | 3 | 3178.4269 | 0.0363 | 0 | 6.10E-08 | DTNYTLNTDSL<br>DWALYDHLMD<br>FLADR     | Oxidation (M);<br>Acetyl:2H(3) (N-term)      |
|         | 1177.263  | 3528.7672 | 3 | 3528.7306 | 0.0365 | 0 | 0.0032   | GVDNTFADELV<br>ELSTALEHQEYI<br>TFLEDLK | Acetyl:2H(3) (N-term);<br>Acetyl:2H(3) (K)   |

|   |              |                                                                                                       |          |         |          |           |   |           |         |   |        |                   |                                                                |
|---|--------------|-------------------------------------------------------------------------------------------------------|----------|---------|----------|-----------|---|-----------|---------|---|--------|-------------------|----------------------------------------------------------------|
| 5 | HSP90<br>AB1 | Heat shock<br>protein HSP<br>90-beta<br>OS=Homo<br>sapiens<br>OX=9606<br>GN=HSP90A<br>B1 PE=1<br>SV=4 | 62.05±29 | (1)21.4 | 412.7471 | 823.4796  | 2 | 822.4969  | 0.9826  | 0 | 1.4    | SLVSVTK           | Acetyl:2H(3) (N-term);<br>Acetyl:2H(3) (K)                     |
|   |              |                                                                                                       |          |         | 496.2966 | 990.5786  | 2 | 990.5769  | 0.0016  | 0 | 0.021  | TKPIWTR           | Acetyl:2H(3) (N-term);<br>Acetyl:2H(3) (K)                     |
|   |              |                                                                                                       |          |         | 582.7715 | 1163.5284 | 2 | 1163.5499 | -0.0215 | 0 | 1.8    | APFDLFENK         | Acetyl (N-term); Acetyl<br>(K)                                 |
|   |              |                                                                                                       |          |         | 662.8026 | 1323.5905 | 2 | 1323.6203 | -0.0297 | 1 | 2.3    | FENLCKLMK         | Oxidation (M); Acetyl<br>(N-term); 2 Acetyl (K)                |
|   |              |                                                                                                       |          |         | 666.8867 | 1331.7589 | 2 | 1331.7567 | 0.0022  | 0 | 1.3    | ADLINNLGTIAK      | Acetyl:2H(3) (N-term);<br>Acetyl:2H(3) (K)                     |
|   |              |                                                                                                       |          |         | 675.252  | 1348.4894 | 2 | 1347.5145 | 0.9749  | 0 | 1      | DNSTMGYMMA<br>K   | Oxidation (M); Acetyl<br>(N-term); Acetyl (K)                  |
|   |              |                                                                                                       |          |         | 678.8052 | 1355.5958 | 2 | 1355.592  | 0.0038  | 0 | 0.0013 | EDQTEYLEER        | Acetyl:2H(3) (N-term)                                          |
|   |              |                                                                                                       |          |         | 720.38   | 1438.7455 | 2 | 1438.786  | -0.0405 | 0 | 2.6    | TLTLVDTGIGM<br>TK | Acetyl:2H(3) (N-term);<br>Acetyl:2H(3) (K)                     |
|   |              |                                                                                                       |          |         | 764.8323 | 1527.65   | 2 | 1526.6765 | 0.9735  | 1 | 0.99   | DNSTMGYMMA<br>KK  | Oxidation (M);<br>Acetyl:2H(3) (N-term); 2<br>Acetyl:2H(3) (K) |

|       |           |           |   |           |         |   |          |                                     |                                                                |
|-------|-----------|-----------|---|-----------|---------|---|----------|-------------------------------------|----------------------------------------------------------------|
|       | 876.5145  | 1751.0144 | 2 | 1749.9823 | 1.0321  | 1 | 1.2      | ADLINNLGTIAK<br>SGTK                | Acetyl:2H(3) (N-term); 2<br>Acetyl:2H(3) (K)                   |
|       | 835.3378  | 2502.9914 | 3 | 2503.0246 | -0.0331 | 1 | 3.4      | DDEEKPKIEDV<br>GSDEEDDSGK           | Acetyl (N-term); 3<br>Acetyl (K)                               |
|       | 908.8177  | 2723.4312 | 3 | 2723.4977 | -0.0665 | 1 | 1.1      | TLTLVDTGIGM<br>TKADLINNLGTI<br>AK   | Oxidation (M);<br>Acetyl:2H(3) (N-term); 2<br>Acetyl:2H(3) (K) |
|       | 969.1038  | 2904.2896 | 3 | 2903.3326 | 0.957   | 1 | 1.1      | LVSSPCCIVTST<br>YGWTANMERI<br>MK    | Oxidation (M); Acetyl<br>(N-term); Acetyl (K)                  |
|       | 1011.8607 | 3032.5603 | 3 | 3032.5534 | 0.0069  | 0 | 3.50E-05 | DLVVLLFETAL<br>LSSGFSLEDPQT<br>HSNR | Acetyl:2H(3) (N-term)                                          |
| (2)21 | 412.7507  | 823.4869  | 2 | 822.4969  | 0.99    | 0 | 1.2      | SLVSVTK                             | Acetyl:2H(3) (N-term);<br>Acetyl:2H(3) (K)                     |
|       | 496.3016  | 990.5887  | 2 | 990.5769  | 0.0117  | 0 | 0.054    | TKPIWTR                             | Acetyl:2H(3) (N-term);<br>Acetyl:2H(3) (K)                     |
|       | 499.2372  | 996.4599  | 2 | 995.4864  | 0.9735  | 0 | 0.43     | ADHGEPIGR                           | Acetyl:2H(3) (N-term)                                          |
|       | 620.3492  | 1238.6839 | 2 | 1238.6698 | 0.0141  | 0 | 0.83     | IDIIPNPQER                          | Acetyl:2H(3) (N-term)                                          |
|       | 666.8917  | 1331.7689 | 2 | 1331.7567 | 0.0122  | 0 | 0.1      | ADLINNLGTIAK                        | Acetyl:2H(3) (N-term);<br>Acetyl:2H(3) (K)                     |
|       | 675.2584  | 1348.5023 | 2 | 1347.5145 | 0.9878  | 0 | 0.83     | DNSTMGYMMA<br>K                     | Oxidation (M); Acetyl<br>(N-term); Acetyl (K)                  |
|       | 720.409   | 1438.8034 | 2 | 1438.786  | 0.0174  | 0 | 0.00021  | TLTLVDTGIGM<br>TK                   | Acetyl:2H(3) (N-term);<br>Acetyl:2H(3) (K)                     |

|         |           |           |   |           |         |   |          |                                     |                                                                |
|---------|-----------|-----------|---|-----------|---------|---|----------|-------------------------------------|----------------------------------------------------------------|
|         | 779.9193  | 1557.8239 | 2 | 1557.8078 | 0.0162  | 0 | 0.00024  | GVVDSIDLPLN<br>ISR                  | Acetyl:2H(3) (N-term)                                          |
|         | 831.7064  | 2492.0974 | 3 | 2492.1214 | -0.0239 | 0 | 1.5      | LVSSPCCIVTST<br>YGWTANMER           | Oxidation (M);<br>Acetyl:2H(3) (N-term)                        |
|         | 846.3835  | 2536.1286 | 3 | 2535.0894 | 1.0393  | 1 | 1.6      | YHTSQSGDEMT<br>SLSEYVSRMK           | Oxidation (M); Acetyl<br>(N-term); Acetyl (K)                  |
|         | 909.1472  | 2724.4198 | 3 | 2723.4977 | 0.9221  | 1 | 0.78     | TLTLVDTGIGM<br>TKADLINNLGTI<br>AK   | Oxidation (M);<br>Acetyl:2H(3) (N-term); 2<br>Acetyl:2H(3) (K) |
|         | 1011.8686 | 3032.584  | 3 | 3032.5534 | 0.0306  | 0 | 2.80E-07 | DLVVLLFETAL<br>LSSGFSLEDPQT<br>HSNR | Acetyl:2H(3) (N-term)                                          |
|         | 1517.8027 | 3033.5908 | 2 | 3032.5534 | 1.0374  | 0 | 1.80E-08 | DLVVLLFETAL<br>LSSGFSLEDPQT<br>HSNR | Acetyl:2H(3) (N-term)                                          |
| (3)27.2 | 412.7474  | 823.4803  | 2 | 822.4969  | 0.9833  | 0 | 1.5      | SLVSVTK                             | Acetyl:2H(3) (N-term);<br>Acetyl:2H(3) (K)                     |
|         | 437.7837  | 873.5529  | 2 | 873.5515  | 0.0014  | 0 | 0.0019   | ALLFIPR                             | Acetyl:2H(3) (N-term)                                          |
|         | 496.2963  | 990.5781  | 2 | 990.5769  | 0.0012  | 0 | 0.01     | TKPIWTR                             | Acetyl:2H(3) (N-term);<br>Acetyl:2H(3) (K)                     |
|         | 498.7515  | 995.4885  | 2 | 995.4864  | 0.0021  | 0 | 0.57     | ADHGEPIGR                           | Acetyl:2H(3) (N-term)                                          |
|         | 620.3436  | 1238.6726 | 2 | 1238.6698 | 0.0028  | 0 | 0.014    | IDIIPNPQER                          | Acetyl:2H(3) (N-term)                                          |
|         | 655.3234  | 1308.6322 | 2 | 1307.6254 | 1.0068  | 1 | 1.7      | FENLCKLMK                           | Acetyl (N-term); 2<br>Acetyl (K)                               |
|         | 662.8019  | 1323.5893 | 2 | 1323.6203 | -0.031  | 1 | 11       | FENLCKLMK                           | Oxidation (M); Acetyl<br>(N-term); 2 Acetyl (K)                |



|          |           |   |           |        |   |          |                           |                                                          |
|----------|-----------|---|-----------|--------|---|----------|---------------------------|----------------------------------------------------------|
| 664.3641 | 1326.7137 | 2 | 1325.7191 | 0.9947 | 0 | 3.8      | ADLINNLGTIAK              | Acetyl (N-term); Acetyl (K)                              |
| 666.8869 | 1331.7592 | 2 | 1331.7567 | 0.0025 | 0 | 0.09     | ADLINNLGTIAK              | Acetyl:2H(3) (N-term); Acetyl:2H(3) (K)                  |
| 675.2494 | 1348.4843 | 2 | 1347.5145 | 0.9698 | 0 | 0.93     | DNSTMGYMMA<br>K           | Oxidation (M); Acetyl (N-term); Acetyl (K)               |
| 678.8062 | 1355.5977 | 2 | 1355.592  | 0.0058 | 0 | 1.80E-06 | EDQTEYLEER                | Acetyl:2H(3) (N-term)                                    |
| 720.4018 | 1438.789  | 2 | 1438.786  | 0.003  | 0 | 0.25     | TLTLVDTGIGM<br>TK         | Acetyl:2H(3) (N-term); Acetyl:2H(3) (K)                  |
| 764.834  | 1527.6534 | 2 | 1526.6765 | 0.9769 | 1 | 4.7      | DNSTMGYMMA<br>KK          | Oxidation (M); Acetyl:2H(3) (N-term); 2 Acetyl:2H(3) (K) |
| 779.9135 | 1557.8125 | 2 | 1557.8078 | 0.0047 | 0 | 3.40E-07 | GVVDSDDLPLN<br>ISR        | Acetyl:2H(3) (N-term)                                    |
| 790.332  | 1578.6495 | 2 | 1577.6217 | 1.0278 | 0 | 1.9      | IEDVGSDEEDD<br>SGK        | Acetyl (N-term); Acetyl (K)                              |
| 809.9085 | 1617.8023 | 2 | 1616.7953 | 1.007  | 0 | 0.0021   | SLTNDWEDHLA<br>VK         | Acetyl:2H(3) (N-term); Acetyl:2H(3) (K)                  |
| 637.3009 | 1908.8809 | 3 | 1908.865  | 0.0158 | 1 | 5.9      | AQALRDNSTM<br>GYMMAK      | 2 Oxidation (M); Acetyl:2H(3) (N-term); Acetyl:2H(3) (K) |
| 820.4234 | 2458.2484 | 3 | 2457.2057 | 1.0427 | 1 | 4        | GVVDSDDLPLN<br>ISREMLQQSK | Oxidation (M); Acetyl (N-term); Acetyl (K)               |
| 846.3769 | 2536.109  | 3 | 2535.0894 | 1.0197 | 1 | 1.7      | YHTSQSGDEMT<br>SLSEYVSRMK | Oxidation (M); Acetyl (N-term); Acetyl (K)               |

|   |           |                                                                                           |          |         |           |           |   |           |         |   |          |                                     |                                                 |
|---|-----------|-------------------------------------------------------------------------------------------|----------|---------|-----------|-----------|---|-----------|---------|---|----------|-------------------------------------|-------------------------------------------------|
| 6 | YWH<br>AZ | 14-3-3<br>protein<br>zeta/delta<br>OS=Homo<br>sapiens<br>OX=9606<br>GN=YWHAZ<br>PE=1 SV=1 | 127.9±54 | (1)38.8 | 1011.8613 | 3032.5621 | 3 | 3032.5534 | 0.0087  | 0 | 1.60E-05 | DLVVLLFETAL<br>LSSGFSLEDPQT<br>HSNR | Acetyl:2H(3) (N-term)                           |
|   |           |                                                                                           |          |         | 585.2965  | 1168.5785 | 2 | 1168.5738 | 0.0047  | 0 | 0.012    | EMQPTHPIR                           | Oxidation (M);<br>Acetyl:2H(3) (N-term)         |
|   |           |                                                                                           |          |         | 617.8495  | 1233.6844 | 2 | 1233.683  | 0.0014  | 0 | 7.80E-06 | DSTLIMQLLR                          | Acetyl:2H(3) (N-term)                           |
|   |           |                                                                                           |          |         | 618.7996  | 1235.5846 | 2 | 1234.5717 | 1.0129  | 0 | 6.5      | YLAEVAAGDD<br>K                     | Acetyl (N-term); Acetyl<br>(K)                  |
|   |           |                                                                                           |          |         | 625.842   | 1249.6695 | 2 | 1249.6779 | -0.0084 | 0 | 1.1      | DSTLIMQLLR                          | Oxidation (M);<br>Acetyl:2H(3) (N-term)         |
|   |           |                                                                                           |          |         | 499.2764  | 1494.8074 | 3 | 1494.7949 | 0.0125  | 1 | 0.42     | SSWRVVSSIEQ<br>K                    | Acetyl:2H(3) (N-term);<br>Acetyl:2H(3) (K)      |
|   |           |                                                                                           |          |         | 797.3808  | 1592.747  | 2 | 1592.7357 | 0.0113  | 0 | 1.30E-07 | SVTEQGAELSN<br>EER                  | Acetyl:2H(3) (N-term)                           |
|   |           |                                                                                           |          |         | 673.2682  | 2016.7829 | 3 | 2016.8227 | -0.0398 | 1 | 3.5      | LAEQAERYDD<br>MAACMK                | 2 Oxidation (M); Acetyl<br>(N-term); Acetyl (K) |
|   |           |                                                                                           |          |         | 819.0223  | 2454.045  | 3 | 2453.0182 | 1.0268  | 0 | 1.6      | DNLTLWTSDTQ<br>GDEAEAGEGGE<br>N     | Acetyl:2H(3) (N-term)                           |

|         |          |           |   |           |         |   |          |                                 |                                      |
|---------|----------|-----------|---|-----------|---------|---|----------|---------------------------------|--------------------------------------|
| (2)38.4 | 496.2696 | 990.5246  | 2 | 990.5386  | -0.0139 | 0 | 2.7      | NLLSVAYK                        | Acetyl (N-term); Acetyl (K)          |
|         | 585.7867 | 1169.5588 | 2 | 1168.5738 | 0.985   | 0 | 0.089    | EMQPTHPIR                       | Oxidation (M); Acetyl:2H(3) (N-term) |
|         | 617.8544 | 1233.6943 | 2 | 1233.683  | 0.0113  | 0 | 7.30E-05 | DSTLIMQLLR                      | Acetyl:2H(3) (N-term)                |
|         | 618.8036 | 1235.5926 | 2 | 1234.5717 | 1.0209  | 0 | 0.64     | YLAEVAAGDD<br>K                 | Acetyl (N-term); Acetyl (K)          |
|         | 625.8528 | 1249.6909 | 2 | 1249.6779 | 0.013   | 0 | 6.50E-05 | DSTLIMQLLR                      | Oxidation (M); Acetyl:2H(3) (N-term) |
|         | 797.3878 | 1592.761  | 2 | 1592.7357 | 0.0253  | 0 | 1.40E-06 | SVTEQGAELSN<br>EER              | Acetyl:2H(3) (N-term)                |
|         | 766.0641 | 2295.1704 | 3 | 2294.1066 | 1.0638  | 1 | 1.6      | GIVDQSQQAYQ<br>EAFEISKK         | Acetyl (N-term); 2 Acetyl (K)        |
|         | 817.994  | 2450.9602 | 3 | 2449.9993 | 0.9609  | 0 | 2.3      | DNLTLWTSDTQ<br>GDEAEAGEGGE<br>N | Acetyl (N-term)                      |
| (3)41.6 | 585.7809 | 1169.5473 | 2 | 1168.5738 | 0.9735  | 0 | 0.33     | EMQPTHPIR                       | Oxidation (M); Acetyl:2H(3) (N-term) |
|         | 617.8491 | 1233.6836 | 2 | 1233.683  | 0.0006  | 0 | 8.10E-06 | DSTLIMQLLR                      | Acetyl:2H(3) (N-term)                |
|         | 618.7976 | 1235.5807 | 2 | 1234.5717 | 1.009   | 0 | 0.27     | YLAEVAAGDD<br>K                 | Acetyl (N-term); Acetyl (K)          |
|         | 625.8468 | 1249.6791 | 2 | 1249.6779 | 0.0012  | 0 | 5.40E-06 | DSTLIMQLLR                      | Oxidation (M); Acetyl:2H(3) (N-term) |
|         | 797.3785 | 1592.7425 | 2 | 1592.7357 | 0.0068  | 0 | 2.60E-07 | SVTEQGAELSN<br>EER              | Acetyl:2H(3) (N-term)                |

|   |              |                                                                                                        |                     |           |           |   |           |         |   |         |                                 |                                                 |
|---|--------------|--------------------------------------------------------------------------------------------------------|---------------------|-----------|-----------|---|-----------|---------|---|---------|---------------------------------|-------------------------------------------------|
|   |              |                                                                                                        |                     | 1009.4381 | 2016.8616 | 2 | 2016.8227 | 0.039   | 1 | 3.3     | LAEQAERYDD<br>MAACMK            | 2 Oxidation (M); Acetyl<br>(N-term); Acetyl (K) |
|   |              |                                                                                                        |                     | 766.0605  | 2295.1596 | 3 | 2294.1066 | 1.0529  | 1 | 4.5     | GIVDQSQQAYQ<br>EAFEISKK         | Acetyl (N-term); 2<br>Acetyl (K)                |
|   |              |                                                                                                        |                     | 819.0236  | 2454.0489 | 3 | 2453.0182 | 1.0307  | 0 | 3.5     | DNLTLTWSDTQ<br>GDEAEAGEGGE<br>N | Acetyl:2H(3) (N-term)                           |
| 7 | HSP90<br>AA1 | Heat shock<br>protein HSP<br>90-alpha<br>OS=Homo<br>sapiens<br>OX=9606<br>GN=HSP90A<br>A1 PE=1<br>SV=5 | 107.1±20<br>(1)21.2 | 496.2966  | 990.5786  | 2 | 990.5769  | 0.0016  | 0 | 0.021   | TKPIWTR                         | Acetyl:2H(3) (N-term);<br>Acetyl:2H(3) (K)      |
|   |              |                                                                                                        |                     | 640.2934  | 1278.5721 | 2 | 1277.5539 | 1.0183  | 0 | 2.1     | DNSTMGYMAA<br>K                 | Acetyl:2H(3) (N-term);<br>Acetyl:2H(3) (K)      |
|   |              |                                                                                                        |                     | 640.8215  | 1279.6285 | 2 | 1279.6236 | 0.0049  | 0 | 0.00038 | DQVANSFAVER                     | Acetyl:2H(3) (N-term)                           |
|   |              |                                                                                                        |                     | 655.8422  | 1309.6699 | 2 | 1308.6654 | 1.0045  | 1 | 0.00032 | RAPFDLFENR                      | Acetyl:2H(3) (N-term)                           |
|   |              |                                                                                                        |                     | 662.8026  | 1323.5905 | 2 | 1323.6203 | -0.0297 | 1 | 2.3     | FENLCKIMK                       | Oxidation (M); Acetyl<br>(N-term); 2 Acetyl (K) |
|   |              |                                                                                                        |                     | 666.8867  | 1331.7589 | 2 | 1331.7567 | 0.0022  | 0 | 1.3     | ADLINNLGTIAK                    | Acetyl:2H(3) (N-term);<br>Acetyl:2H(3) (K)      |
|   |              |                                                                                                        |                     | 678.8052  | 1355.5958 | 2 | 1355.592  | 0.0038  | 0 | 0.0013  | EDQTEYLEER                      | Acetyl:2H(3) (N-term)                           |

|         |           |           |   |           |         |   |          |                                     |                                                                |
|---------|-----------|-----------|---|-----------|---------|---|----------|-------------------------------------|----------------------------------------------------------------|
|         | 720.38    | 1438.7455 | 2 | 1438.786  | -0.0405 | 0 | 2.6      | TLTIVDTGIGMT<br>K                   | Acetyl:2H(3) (N-term);<br>Acetyl:2H(3) (K)                     |
|         | 876.5145  | 1751.0144 | 2 | 1749.9823 | 1.0321  | 1 | 1.2      | ADLINNLGTIAK<br>SGTK                | Acetyl:2H(3) (N-term); 2<br>Acetyl:2H(3) (K)                   |
|         | 1239.0741 | 2476.1336 | 2 | 2475.1893 | 0.9443  | 0 | 2.2      | VFIMDNCEELIP<br>EYLNfir             | Oxidation (M);<br>Acetyl:2H(3) (N-term)                        |
|         | 877.4069  | 2629.1988 | 3 | 2628.2716 | 0.9272  | 1 | 3        | RVFIMDNCEELI<br>PEYLNfir            | Oxidation (M); Acetyl<br>(N-term)                              |
|         | 889.8013  | 2666.382  | 3 | 2666.3242 | 0.0577  | 0 | 3        | HGLEVIYMEPI<br>DEYCVQQLK            | Acetyl:2H(3) (N-term);<br>Acetyl:2H(3) (K)                     |
|         | 1358.2291 | 2714.4436 | 2 | 2714.4412 | 0.0024  | 1 | 3.8      | TLTIVDTGIGMT<br>KADLINNLGTIA<br>K   | Oxidation (M); Acetyl<br>(N-term); 2 Acetyl (K)                |
|         | 908.8177  | 2723.4312 | 3 | 2723.4977 | -0.0665 | 1 | 1.1      | TLTIVDTGIGMT<br>KADLINNLGTIA<br>K   | Oxidation (M);<br>Acetyl:2H(3) (N-term); 2<br>Acetyl:2H(3) (K) |
|         | 1016.8665 | 3047.5777 | 3 | 3046.569  | 1.0086  | 0 | 8.80E-07 | DLVILLYETALL<br>SSGFSLEDPQTH<br>ANR | Acetyl:2H(3) (N-term)                                          |
| (2)12.8 | 496.3016  | 990.5887  | 2 | 990.5769  | 0.0117  | 0 | 0.054    | TKPIWTR                             | Acetyl:2H(3) (N-term);<br>Acetyl:2H(3) (K)                     |
|         | 640.8269  | 1279.6392 | 2 | 1279.6236 | 0.0156  | 0 | 0.0034   | DQVANSFAVER                         | Acetyl:2H(3) (N-term)                                          |
|         | 655.3471  | 1308.6796 | 2 | 1308.6654 | 0.0142  | 1 | 0.001    | RAPFDLFENR                          | Acetyl:2H(3) (N-term)                                          |
|         | 666.8917  | 1331.7689 | 2 | 1331.7567 | 0.0122  | 0 | 0.1      | ADLINNLGTIAK                        | Acetyl:2H(3) (N-term);<br>Acetyl:2H(3) (K)                     |

|         |           |           |   |           |        |   |          |                                     |                                                                |
|---------|-----------|-----------|---|-----------|--------|---|----------|-------------------------------------|----------------------------------------------------------------|
|         | 720.409   | 1438.8034 | 2 | 1438.786  | 0.0174 | 0 | 0.00021  | TLTIVDTGIGMT<br>K                   | Acetyl:2H(3) (N-term);<br>Acetyl:2H(3) (K)                     |
|         | 779.9193  | 1557.8239 | 2 | 1557.8078 | 0.0162 | 0 | 0.00024  | GVVDSIDLPLN<br>ISR                  | Acetyl:2H(3) (N-term)                                          |
|         | 909.1472  | 2724.4198 | 3 | 2723.4977 | 0.9221 | 1 | 0.78     | TLTIVDTGIGMT<br>KADLINNLGTIA<br>K   | Oxidation (M);<br>Acetyl:2H(3) (N-term); 2<br>Acetyl:2H(3) (K) |
|         | 1016.5406 | 3046.6    | 3 | 3046.569  | 0.0309 | 0 | 4.40E-08 | DLVILLYETALL<br>SSGFSLEDPQTH<br>ANR | Acetyl:2H(3) (N-term)                                          |
| (3)41.8 | 496.2963  | 990.5781  | 2 | 990.5769  | 0.0012 | 0 | 0.01     | TKPIWTR                             | Acetyl:2H(3) (N-term);<br>Acetyl:2H(3) (K)                     |
|         | 606.2785  | 1210.5425 | 2 | 1209.5738 | 0.9687 | 0 | 0.0025   | LGIHEDSQNR                          | Acetyl (N-term)                                                |
|         | 640.8215  | 1279.6284 | 2 | 1279.6236 | 0.0048 | 0 | 0.00014  | DQVANSFAVER                         | Acetyl:2H(3) (N-term)                                          |
|         | 655.3234  | 1308.6322 | 2 | 1307.6254 | 1.0068 | 1 | 1.7      | FENLCKIMK                           | Acetyl (N-term); 2<br>Acetyl (K)                               |
|         | 655.342   | 1308.6694 | 2 | 1308.6654 | 0.0041 | 1 | 4.70E-05 | RAPFDLFENR                          | Acetyl:2H(3) (N-term)                                          |
|         | 656.2996  | 1310.5846 | 2 | 1309.5437 | 1.0409 | 0 | 1.9      | DNSTMGYMAA<br>K                     | 2 Oxidation (M);<br>Acetyl:2H(3) (N-term);<br>Acetyl:2H(3) (K) |
|         | 657.8477  | 1313.6808 | 2 | 1313.6774 | 0.0034 | 0 | 0.44     | HIYYITGETK                          | Acetyl:2H(3) (N-term);<br>Acetyl:2H(3) (K)                     |
|         | 662.8019  | 1323.5893 | 2 | 1323.6203 | -0.031 | 1 | 11       | FENLCKIMK                           | Oxidation (M); Acetyl<br>(N-term); 2 Acetyl (K)                |
|         | 664.3641  | 1326.7137 | 2 | 1325.7191 | 0.9947 | 0 | 3.8      | ADLINNLGTIAK                        | Acetyl (N-term); Acetyl<br>(K)                                 |

|           |           |   |           |        |   |          |                                                  |                                                                |
|-----------|-----------|---|-----------|--------|---|----------|--------------------------------------------------|----------------------------------------------------------------|
| 666.8869  | 1331.7592 | 2 | 1331.7567 | 0.0025 | 0 | 0.09     | ADLINNLGTIAK                                     | Acetyl:2H(3) (N-term);<br>Acetyl:2H(3) (K)                     |
| 678.8062  | 1355.5977 | 2 | 1355.592  | 0.0058 | 0 | 1.80E-06 | EDQTEYLEER                                       | Acetyl:2H(3) (N-term)                                          |
| 720.4018  | 1438.789  | 2 | 1438.786  | 0.003  | 0 | 0.25     | TLTIVDTGIGMT<br>K                                | Acetyl:2H(3) (N-term);<br>Acetyl:2H(3) (K)                     |
| 779.9135  | 1557.8125 | 2 | 1557.8078 | 0.0047 | 0 | 3.40E-07 | GVVDSIDLPLN<br>ISR                               | Acetyl:2H(3) (N-term)                                          |
| 809.9085  | 1617.8023 | 2 | 1616.7953 | 1.007  | 0 | 0.0021   | SLTNDWEDHLA<br>VK                                | Acetyl:2H(3) (N-term);<br>Acetyl:2H(3) (K)                     |
| 761.0615  | 2280.1628 | 3 | 2279.1618 | 1.001  | 1 | 3.1      | TLVSVTKEGLE<br>LPEDEEEK                          | Acetyl:2H(3) (N-term); 2<br>Acetyl:2H(3) (K)                   |
| 820.4234  | 2458.2484 | 3 | 2457.2057 | 1.0427 | 1 | 4        | GVVDSIDLPLN<br>ISREMLQSK                         | Oxidation (M); Acetyl<br>(N-term); Acetyl (K)                  |
| 1239.0687 | 2476.1228 | 2 | 2475.1893 | 0.9335 | 0 | 5.1      | VFIMDNCEELIP<br>EYLNfir                          | Oxidation (M);<br>Acetyl:2H(3) (N-term)                        |
| 831.3658  | 2491.0757 | 3 | 2490.1421 | 0.9336 | 0 | 1.1      | LVTSPCCIVTST<br>YGTANMER                         | Acetyl:2H(3) (N-term)                                          |
| 877.4095  | 2629.2066 | 3 | 2628.2716 | 0.935  | 1 | 5        | RVFIMDNCEELI<br>PEYLNfir                         | Oxidation (M); Acetyl<br>(N-term)                              |
| 1016.5329 | 3046.5769 | 3 | 3046.569  | 0.0078 | 0 | 1.40E-08 | DLVILLYETALL<br>SSGFSLEDPQTH<br>ANR              | Acetyl:2H(3) (N-term)                                          |
| 1347.9515 | 4040.8327 | 3 | 4040.7997 | 0.033  | 1 | 3.6      | MIKLGLGIDED<br>DPTADDTSAAV<br>TEEMPPLGDD<br>DTSR | 2 Oxidation (M);<br>Acetyl:2H(3) (N-term);<br>Acetyl:2H(3) (K) |

|   |       |                                                                                        |                    |         |           |           |   |           |         |   |          |                                                           |                                                                          |
|---|-------|----------------------------------------------------------------------------------------|--------------------|---------|-----------|-----------|---|-----------|---------|---|----------|-----------------------------------------------------------|--------------------------------------------------------------------------|
|   |       |                                                                                        |                    |         | 1086.5501 | 5427.7141 | 5 | 5426.6008 | 1.1133  | 1 | 0.98     | PEETQTQDQPM<br>EEEEVETFAFQ<br>AEIAQLMSLIIN<br>TFYSNKEIFLR | Acetyl:2H(3) (N-term);<br>Acetyl:2H(3) (K)                               |
| 8 | EEF1D | Elongation<br>factor 1-delta<br>OS=Homo<br>sapiens<br>OX=9606<br>GN=EEF1D<br>PE=1 SV=5 | 106.4±8.7<br>(n=2) | (1)17.4 | 396.2414  | 1185.7023 | 3 | 1184.6917 | 1.0106  | 1 | 8        | LVPVGYGIRK                                                | Acetyl (N-term); Acetyl<br>(K)                                           |
|   |       |                                                                                        |                    |         | 702.3829  | 1402.7512 | 2 | 1402.7495 | 0.0017  | 0 | 2.10E-07 | IASLEVENQSLR                                              | Acetyl:2H(3) (N-term)                                                    |
|   |       |                                                                                        |                    |         | 742.8729  | 1483.7313 | 2 | 1483.7281 | 0.0033  | 0 | 0.067    | ATAPQTQHVSP<br>MR                                         | Oxidation (M);<br>Acetyl:2H(3) (N-term)                                  |
|   |       |                                                                                        |                    |         | 794.3674  | 1586.7203 | 2 | 1586.7227 | -0.0023 | 0 | 0.023    | FYEQMNGPVA<br>GASR                                        | Oxidation (M);<br>Acetyl:2H(3) (N-term)                                  |
|   |       |                                                                                        |                    | (3)23.8 | 702.3846  | 1402.7547 | 2 | 1402.7495 | 0.0052  | 0 | 2.30E-06 | IASLEVENQSLR                                              | Acetyl:2H(3) (N-term)                                                    |
|   |       |                                                                                        |                    |         | 734.8755  | 1467.7365 | 2 | 1467.7332 | 0.0033  | 0 | 0.043    | ATAPQTQHVSP<br>MR                                         | Acetyl:2H(3) (N-term)                                                    |
|   |       |                                                                                        |                    |         | 786.3758  | 1570.737  | 2 | 1570.7277 | 0.0093  | 0 | 0.00013  | FYEQMNGPVA<br>GASR                                        | Acetyl:2H(3) (N-term)                                                    |
|   |       |                                                                                        |                    |         | 1014.5165 | 2027.0184 | 2 | 2027.0173 | 0.0012  | 1 | 1.9      | MATNFLAHEKI<br>WFDK                                       | Acetyl (Protein N-term);<br>Acetyl:2H(3) (N-term); 2<br>Acetyl:2H(3) (K) |
|   |       |                                                                                        |                    |         | 1052.5342 | 2103.0538 | 2 | 2102.0076 | 1.0463  | 1 | 2.7      | SSPGHRATAPQ<br>TQHVSPMR                                   | Oxidation (M); Acetyl<br>(N-term)                                        |



|   |      |                                                                         |           |       |           |           |   |           |        |   |          |                                      |                                                              |
|---|------|-------------------------------------------------------------------------|-----------|-------|-----------|-----------|---|-----------|--------|---|----------|--------------------------------------|--------------------------------------------------------------|
|   |      |                                                                         |           |       | 1137.5504 | 2273.0862 | 2 | 2272.127  | 0.9592 | 1 | 2.2      | ATAPQTQHVSP<br>MRQVEPPAK             | Oxidation (M); Acetyl<br>(N-term); Acetyl (K)                |
| 9 | NPM1 | Nucleophosm<br>in OS=Homo<br>sapiens<br>OX=9606<br>GN=NPM1<br>PE=1 SV=2 | 71.21±8.3 | (1)33 | 415.2554  | 828.4963  | 2 | 828.4957  | 0.0007 | 0 | 1.2      | VTLATLK                              | Acetyl (N-term); Acetyl<br>(K)                               |
|   |      |                                                                         |           |       | 489.7779  | 977.5413  | 2 | 976.546   | 0.9953 | 1 | 0.4      | SIRDTPAK                             | Acetyl:2H(3) (N-term);<br>Acetyl:2H(3) (K)                   |
|   |      |                                                                         |           |       | 556.3038  | 1110.5931 | 2 | 1110.5921 | 0.001  | 1 | 2        | GGSLPKVEAK                           | Acetyl (N-term); 2<br>Acetyl (K)                             |
|   |      |                                                                         |           |       | 807.3847  | 1612.7549 | 2 | 1612.752  | 0.0029 | 0 | 3.40E-09 | VDNDENEHQLS<br>LR                    | Acetyl:2H(3) (N-term)                                        |
|   |      |                                                                         |           |       | 940.9441  | 1879.8736 | 2 | 1879.8602 | 0.0134 | 0 | 7.20E-10 | MTDQEAIQDL<br>WQWR                   | Oxidation (M);<br>Acetyl:2H(3) (N-term)                      |
|   |      |                                                                         |           |       | 758.4213  | 2272.242  | 3 | 2271.2376 | 1.0043 | 0 | 0.061    | MSVQPTVSLGG<br>FEITPPVVLRL           | Acetyl:2H(3) (N-term)                                        |
|   |      |                                                                         |           |       | 763.4191  | 2287.2355 | 3 | 2287.2326 | 0.0029 | 0 | 6.30E-08 | MSVQPTVSLGG<br>FEITPPVVLRL           | Oxidation (M);<br>Acetyl:2H(3) (N-term)                      |
|   |      |                                                                         |           |       | 999.7823  | 2996.3252 | 3 | 2996.3005 | 0.0247 | 0 | 1.5      | MEDSMDMDMS<br>PLRPQNYLFGC<br>ELK     | Acetyl:2H(3) (N-term);<br>Acetyl:2H(3) (K)                   |
|   |      |                                                                         |           |       | 765.9531  | 3059.7834 | 4 | 3058.7259 | 1.0575 | 1 | 3.8      | VTLATLKMSVQ<br>PTVSLGGFEITP<br>PVVLR | Oxidation (M);<br>Acetyl:2H(3) (N-term);<br>Acetyl:2H(3) (K) |

|         |           |           |   |           |        |   |          |                                         |                                            |
|---------|-----------|-----------|---|-----------|--------|---|----------|-----------------------------------------|--------------------------------------------|
| (2)34.7 | 404.2623  | 806.5101  | 2 | 806.502   | 0.0081 | 0 | 6.30E-05 | LLSISGK                                 | Acetyl:2H(3) (N-term);<br>Acetyl:2H(3) (K) |
|         | 418.2783  | 834.5421  | 2 | 834.5333  | 0.0088 | 0 | 0.38     | VTLATLK                                 | Acetyl:2H(3) (N-term);<br>Acetyl:2H(3) (K) |
|         | 482.3115  | 962.6085  | 2 | 962.6031  | 0.0053 | 1 | 3        | LLSISGKR                                | Acetyl:2H(3) (N-term);<br>Acetyl:2H(3) (K) |
|         | 489.782   | 977.5494  | 2 | 976.546   | 1.0034 | 1 | 1.1      | SIRDTPAK                                | Acetyl:2H(3) (N-term);<br>Acetyl:2H(3) (K) |
|         | 807.3914  | 1612.7683 | 2 | 1612.752  | 0.0163 | 0 | 0.0013   | VDNDENEHQLS<br>LR                       | Acetyl:2H(3) (N-term)                      |
|         | 940.9481  | 1879.8817 | 2 | 1879.8602 | 0.0215 | 0 | 6.10E-10 | MTDQEIQDL<br>WQWR                       | Oxidation (M);<br>Acetyl:2H(3) (N-term)    |
|         | 758.0951  | 2271.2634 | 3 | 2271.2376 | 0.0257 | 0 | 3.70E-07 | MSVQPTVSLGG<br>FEITPPVVLRL              | Acetyl:2H(3) (N-term)                      |
|         | 763.4268  | 2287.2586 | 3 | 2287.2326 | 0.026  | 0 | 1.40E-07 | MSVQPTVSLGG<br>FEITPPVVLRL              | Oxidation (M);<br>Acetyl:2H(3) (N-term)    |
|         | 1145.156  | 2288.2974 | 2 | 2287.2326 | 1.0649 | 0 | 0.21     | MSVQPTVSLGG<br>FEITPPVVLRL              | Oxidation (M);<br>Acetyl:2H(3) (N-term)    |
|         | 1157.8832 | 3470.6278 | 3 | 3469.5222 | 1.1056 | 0 | 1.2      | CGSGPVHISGQ<br>HLVAVEEDAES<br>EDEEEEDVK | Acetyl:2H(3) (N-term);<br>Acetyl:2H(3) (K) |
| (3)36.7 | 418.2751  | 834.5355  | 2 | 834.5333  | 0.0022 | 0 | 1.2      | VTLATLK                                 | Acetyl:2H(3) (N-term);<br>Acetyl:2H(3) (K) |
|         | 489.7768  | 977.5391  | 2 | 976.546   | 0.9931 | 1 | 0.79     | SIRDTPAK                                | Acetyl:2H(3) (N-term);<br>Acetyl:2H(3) (K) |

|    |             |                                                           |                     |           |           |   |           |         |   |          |                                     |                                                                          |
|----|-------------|-----------------------------------------------------------|---------------------|-----------|-----------|---|-----------|---------|---|----------|-------------------------------------|--------------------------------------------------------------------------|
|    |             |                                                           |                     | 532.7793  | 1063.5439 | 2 | 1063.5417 | 0.0023  | 0 | 1.1      | DSKPSSTPR                           | Acetyl:2H(3) (N-term);<br>Acetyl:2H(3) (K)                               |
|    |             |                                                           |                     | 1147.5541 | 1146.5468 | 1 | 1146.5591 | -0.0122 | 1 | 1        | AKMQASIEK                           | Oxidation (M); Acetyl<br>(N-term); 2 Acetyl (K)                          |
|    |             |                                                           |                     | 807.3887  | 1612.7628 | 2 | 1612.752  | 0.0108  | 0 | 1.60E-08 | VDNDENEHQLS<br>LR                   | Acetyl:2H(3) (N-term)                                                    |
|    |             |                                                           |                     | 940.94    | 1879.8655 | 2 | 1879.8602 | 0.0053  | 0 | 2.10E-07 | MTDQEAIQDL<br>WQWR                  | Oxidation (M);<br>Acetyl:2H(3) (N-term)                                  |
|    |             |                                                           |                     | 1136.626  | 2271.2374 | 2 | 2271.2376 | -0.0002 | 0 | 1.90E-12 | MSVQPTVSLGG<br>FEITPPVVLR           | Acetyl:2H(3) (N-term)                                                    |
|    |             |                                                           |                     | 758.0874  | 2271.2404 | 3 | 2271.2376 | 0.0028  | 0 | 3.90E-08 | MSVQPTVSLGG<br>FEITPPVVLR           | Acetyl:2H(3) (N-term)                                                    |
|    |             |                                                           |                     | 763.4195  | 2287.2367 | 3 | 2287.2326 | 0.0041  | 0 | 3.10E-09 | MSVQPTVSLGG<br>FEITPPVVLR           | Oxidation (M);<br>Acetyl:2H(3) (N-term)                                  |
|    |             |                                                           |                     | 1145.1429 | 2288.2712 | 2 | 2287.2326 | 1.0387  | 0 | 0.0079   | MSVQPTVSLGG<br>FEITPPVVLR           | Oxidation (M);<br>Acetyl:2H(3) (N-term)                                  |
|    |             |                                                           |                     | 1629.6906 | 3257.3666 | 2 | 3256.4383 | 0.9284  | 1 | 1.9      | EDSMDMDMSP<br>LRPQNYLFGCE<br>LKADK  | 2 Oxidation (M);<br>Acetyl:2H(3) (N-term); 2<br>Acetyl:2H(3) (K)         |
|    |             |                                                           |                     | 850.6523  | 3398.5802 | 4 | 3397.4995 | 1.0807  | 1 | 1.8      | MEDSMDMDMS<br>PLRPQNYLFGC<br>ELKADK | Acetyl (Protein N-term);<br>Acetyl:2H(3) (N-term); 2<br>Acetyl:2H(3) (K) |
| 10 | ATP5F<br>1B | ATP synthase<br>subunit beta,<br>mitochondrial<br>OS=Homo | 56.38±32<br>(1)36.5 | 530.7918  | 1059.569  | 2 | 1058.5761 | 0.9929  | 0 | 0.71     | IGLFGGAGVGK                         | Acetyl (N-term); Acetyl<br>(K)                                           |

sapiens  
OX=9606  
GN=ATP5F1  
B PE=1  
SV=3

|           |           |   |           |         |   |          |                                       |                                                 |
|-----------|-----------|---|-----------|---------|---|----------|---------------------------------------|-------------------------------------------------|
| 723.8702  | 1445.7258 | 2 | 1445.7263 | -0.0005 | 0 | 0.01     | IMNVIGEPIDER                          | Oxidation (M);<br>Acetyl:2H(3) (N-term)         |
| 742.9137  | 1483.8129 | 2 | 1483.8114 | 0.0015  | 0 | 1.70E-09 | VALTGLTVAEY<br>FR                     | Acetyl:2H(3) (N-term)                           |
| 832.4243  | 1662.834  | 2 | 1661.8275 | 1.0065  | 0 | 0.35     | VALVYGQMNE<br>PPGAR                   | Oxidation (M);<br>Acetyl:2H(3) (N-term)         |
| 938.9526  | 1875.8906 | 2 | 1875.8864 | 0.0042  | 0 | 1.20E-05 | IMDPNIVGSEH<br>YDVAR                  | Oxidation (M);<br>Acetyl:2H(3) (N-term)         |
| 1017.5372 | 2033.0598 | 2 | 2032.0556 | 1.0043  | 0 | 1.60E-05 | AIAELGIYPAVD<br>PLDSTSR               | Acetyl:2H(3) (N-term)                           |
| 1164.0593 | 2326.104  | 2 | 2326.1013 | 0.0028  | 0 | 2.7      | IPSAVGYQPTLA<br>TDMGTMQER             | Oxidation (M);<br>Acetyl:2H(3) (N-term)         |
| 1355.2145 | 2708.4144 | 2 | 2707.4758 | 0.9386  | 1 | 3.1      | FLSQPFQVAEV<br>FTGHMGKLVPL<br>K       | Acetyl:2H(3) (N-term); 2<br>Acetyl:2H(3) (K)    |
| 1358.2291 | 2714.4436 | 2 | 2714.4142 | 0.0294  | 1 | 0.96     | FLSQPFQVAEV<br>FTGHMGKLVPL<br>K       | Oxidation (M); Acetyl<br>(N-term); 2 Acetyl (K) |
| 1026.2449 | 3075.7129 | 3 | 3075.7048 | 0.0081  | 0 | 6.00E-09 | IVAVIGAVVDV<br>QFDEGLPPILNA<br>LEVQGR | Acetyl:2H(3) (N-term)                           |

|  |         |           |           |   |           |        |   |          |                                                  |                                                              |
|--|---------|-----------|-----------|---|-----------|--------|---|----------|--------------------------------------------------|--------------------------------------------------------------|
|  |         | 1050.838  | 3149.4922 | 3 | 3149.5572 | -0.065 | 0 | 0.36     | QFAPIHAEAPEF<br>MEMSVEQEILV<br>TGIK              | Oxidation (M);<br>Acetyl:2H(3) (N-term);<br>Acetyl:2H(3) (K) |
|  |         | 1051.1654 | 3150.4744 | 3 | 3149.5572 | 0.9172 | 0 | 0.64     | QFAPIHAEAPEF<br>MEMSVEQEILV<br>TGIK              | Oxidation (M);<br>Acetyl:2H(3) (N-term);<br>Acetyl:2H(3) (K) |
|  |         | 1220.353  | 3658.0372 | 3 | 3656.989  | 1.0482 | 1 | 0.76     | AGAATGRIVAV<br>IGAVVDVQFDE<br>GLPPILNALEVQ<br>GR | Acetyl (N-term)                                              |
|  | (2)50.7 | 530.7975  | 1059.5804 | 2 | 1058.5761 | 1.0044 | 0 | 3.5      | IGLFGGAGVGK                                      | Acetyl (N-term); Acetyl (K)                                  |
|  |         | 628.2933  | 1254.5721 | 2 | 1253.6046 | 0.9675 | 0 | 4.2      | DYAAQTSPSPK                                      | Acetyl:2H(3) (N-term);<br>Acetyl:2H(3) (K)                   |
|  |         | 660.8088  | 1319.6031 | 2 | 1319.6391 | -0.036 | 0 | 5.7      | TIAMDGTGLV<br>R                                  | Oxidation (M); Acetyl (N-term)                               |
|  |         | 662.3443  | 1322.674  | 2 | 1322.6579 | 0.0161 | 0 | 0.021    | TIAMDGTGLV<br>R                                  | Oxidation (M);<br>Acetyl:2H(3) (N-term)                      |
|  |         | 724.3805  | 1446.7465 | 2 | 1445.7263 | 1.0202 | 0 | 0.1      | IMNVIGEPIDER                                     | Oxidation (M);<br>Acetyl:2H(3) (N-term)                      |
|  |         | 740.9032  | 1479.7919 | 2 | 1479.7761 | 0.0158 | 0 | 5.90E-08 | FTQAGSEVSAL<br>LGR                               | Acetyl:2H(3) (N-term)                                        |
|  |         | 742.9208  | 1483.827  | 2 | 1483.8114 | 0.0156 | 0 | 6.20E-08 | VALTGLTVAEY<br>FR                                | Acetyl:2H(3) (N-term)                                        |
|  |         | 809.9891  | 1617.9636 | 2 | 1617.9454 | 0.0182 | 0 | 1.1      | LTPSASLPPAQL<br>LLR                              | Acetyl (N-term)                                              |

|           |           |   |           |         |   |          |                                       |                                                              |
|-----------|-----------|---|-----------|---------|---|----------|---------------------------------------|--------------------------------------------------------------|
| 823.9335  | 1645.8524 | 2 | 1645.8325 | 0.0199  | 0 | 0.0023   | VALVYGMNE<br>PPGAR                    | Acetyl:2H(3) (N-term)                                        |
| 831.9343  | 1661.854  | 2 | 1661.8275 | 0.0265  | 0 | 0.59     | VALVYGMNE<br>PPGAR                    | Oxidation (M);<br>Acetyl:2H(3) (N-term)                      |
| 853.4211  | 1704.8276 | 2 | 1704.8332 | -0.0056 | 1 | 1.3      | AHGGYSVFAG<br>VGERTR                  | Acetyl (N-term)                                              |
| 984.0119  | 1966.0092 | 2 | 1965.9875 | 0.0217  | 0 | 4.10E-12 | DQEGQDVLLFI<br>DNIFR                  | Acetyl:2H(3) (N-term)                                        |
| 1057.5448 | 2113.075  | 2 | 2112.0621 | 1.0129  | 0 | 0.011    | FLSQPFQVAEV<br>FTGHMGK                | Acetyl:2H(3) (N-term);<br>Acetyl:2H(3) (K)                   |
| 782.0498  | 2343.1276 | 3 | 2342.0962 | 1.0314  | 0 | 0.87     | IPSAVGYQPTLA<br>TDMGTMQER             | 2 Oxidation (M);<br>Acetyl:2H(3) (N-term)                    |
| 1354.714  | 2707.4134 | 2 | 2707.4758 | -0.0624 | 1 | 0.73     | FLSQPFQVAEV<br>FTGHMGKLVPL<br>K       | Acetyl:2H(3) (N-term); 2<br>Acetyl:2H(3) (K)                 |
| 1026.2543 | 3075.7411 | 3 | 3075.7048 | 0.0363  | 0 | 7.40E-10 | IVAVIGAVVDV<br>QFDEGLPPILNA<br>LEVQGR | Acetyl:2H(3) (N-term)                                        |
| 1050.8449 | 3149.5129 | 3 | 3149.5572 | -0.0443 | 0 | 1.6      | QFAPIHAEAPEF<br>MEMSVEQEILV<br>TGIK   | Oxidation (M);<br>Acetyl:2H(3) (N-term);<br>Acetyl:2H(3) (K) |
| 788.3858  | 3149.5139 | 4 | 3149.5572 | -0.0433 | 0 | 2.1      | QFAPIHAEAPEF<br>MEMSVEQEILV<br>TGIK   | Oxidation (M);<br>Acetyl:2H(3) (N-term);<br>Acetyl:2H(3) (K) |

|         |           |           |   |           |         |   |          |                                           |                                                                |
|---------|-----------|-----------|---|-----------|---------|---|----------|-------------------------------------------|----------------------------------------------------------------|
|         | 1050.8455 | 3149.5147 | 3 | 3149.5572 | -0.0425 | 0 | 0.75     | QFAPIHAEAPEF<br>MEMSVEQEILV<br>TGIK       | Oxidation (M);<br>Acetyl:2H(3) (N-term);<br>Acetyl:2H(3) (K)   |
|         | 1272.6485 | 3814.9237 | 3 | 3814.875  | 0.0487  | 1 | 1.4      | GFQQILAGEYD<br>HLPEQAFYMVG<br>PIEEAVAKADK | Oxidation (M);<br>Acetyl:2H(3) (N-term); 2<br>Acetyl:2H(3) (K) |
| (3)46.1 | 513.2788  | 1024.5431 | 2 | 1024.5665 | -0.0234 | 0 | 1.2      | VAAAPASGALR                               | Acetyl (N-term)                                                |
|         | 533.8086  | 1065.6027 | 2 | 1064.6137 | 0.989   | 0 | 2        | IGLFGGAGVGK                               | Acetyl:2H(3) (N-term);<br>Acetyl:2H(3) (K)                     |
|         | 542.3165  | 1082.6185 | 2 | 1082.6163 | 0.0022  | 0 | 0.084    | IPVGPETLGR                                | Acetyl:2H(3) (N-term)                                          |
|         | 663.8962  | 1325.7779 | 2 | 1325.7541 | 0.0238  | 1 | 1.9      | GVQKILQDYK                                | Acetyl:2H(3) (N-term); 2<br>Acetyl:2H(3) (K)                   |
|         | 714.8496  | 1427.6845 | 2 | 1426.7126 | 0.972   | 0 | 3.6      | IMNVIGEPIDER                              | Acetyl (N-term)                                                |
|         | 740.8972  | 1479.7798 | 2 | 1479.7761 | 0.0037  | 0 | 8.00E-09 | FTQAGSEVSAL<br>LGR                        | Acetyl:2H(3) (N-term)                                          |
|         | 742.9142  | 1483.8139 | 2 | 1483.8114 | 0.0025  | 0 | 7.20E-10 | VALTGLTVAEY<br>FR                         | Acetyl:2H(3) (N-term)                                          |
|         | 774.4539  | 1546.8933 | 2 | 1546.8911 | 0.0022  | 0 | 0.00023  | TVLMELINNV<br>AK                          | Acetyl:2H(3) (N-term);<br>Acetyl:2H(3) (K)                     |
|         | 831.9229  | 1661.8311 | 2 | 1661.8275 | 0.0037  | 0 | 0.61     | VALVYGMNE<br>PPGAR                        | Oxidation (M);<br>Acetyl:2H(3) (N-term)                        |
|         | 984.0023  | 1965.9901 | 2 | 1965.9875 | 0.0026  | 0 | 8.30E-10 | DQEGQDVLLFI<br>DNIFR                      | Acetyl:2H(3) (N-term)                                          |
|         | 1057.0407 | 2112.0668 | 2 | 2112.0621 | 0.0047  | 0 | 2.40E-05 | FLSQPFQVAEV<br>FTGHMGK                    | Acetyl:2H(3) (N-term);<br>Acetyl:2H(3) (K)                     |

|    |           |                                                                               |                   |       |           |           |   |           |         |   |          |                                       |                                                              |
|----|-----------|-------------------------------------------------------------------------------|-------------------|-------|-----------|-----------|---|-----------|---------|---|----------|---------------------------------------|--------------------------------------------------------------|
|    |           |                                                                               |                   |       | 1113.0679 | 2224.1212 | 2 | 2224.0939 | 0.0274  | 0 | 1.1      | SLQDIILGMD<br>ELSEEDK                 | Oxidation (M);<br>Acetyl:2H(3) (N-term);<br>Acetyl:2H(3) (K) |
|    |           |                                                                               |                   |       | 771.0439  | 2310.1098 | 3 | 2310.1063 | 0.0035  | 0 | 1.00E-05 | IPSAVGYQPTLA<br>TDMGTMQER             | Acetyl:2H(3) (N-term)                                        |
|    |           |                                                                               |                   |       | 1156.5543 | 2311.094  | 2 | 2310.1063 | 0.9877  | 0 | 7.70E-08 | IPSAVGYQPTLA<br>TDMGTMQER             | Acetyl:2H(3) (N-term)                                        |
|    |           |                                                                               |                   |       | 1164.0551 | 2326.0956 | 2 | 2326.1013 | -0.0056 | 0 | 2.2      | IPSAVGYQPTLA<br>TDMGTMQER             | Oxidation (M);<br>Acetyl:2H(3) (N-term)                      |
|    |           |                                                                               |                   |       | 1355.2091 | 2708.4036 | 2 | 2707.4758 | 0.9278  | 1 | 3.2      | FLSQPFQVAEV<br>FTGHMGKLVPL<br>K       | Acetyl:2H(3) (N-term); 2<br>Acetyl:2H(3) (K)                 |
|    |           |                                                                               |                   |       | 1026.2446 | 3075.712  | 3 | 3075.7048 | 0.0072  | 0 | 4.90E-10 | IVAVIGAVVDV<br>QFDEGLPPILNA<br>LEVQGR | Acetyl:2H(3) (N-term)                                        |
|    |           |                                                                               |                   |       | 1050.8327 | 3149.4763 | 3 | 3149.5572 | -0.0809 | 0 | 1.2      | QFAPIHAEPEF<br>MEMSVEQEILV<br>TGIK    | Oxidation (M);<br>Acetyl:2H(3) (N-term);<br>Acetyl:2H(3) (K) |
| 11 | ACTN<br>4 | Alpha-<br>actinin-4<br>OS=Homo<br>sapiens<br>OX=9606<br>GN=ACTN4<br>PE=1 SV=2 | 38.59±12<br>(n=2) | (2)22 | 488.2871  | 974.5596  | 2 | 973.5286  | 1.0311  | 1 | 2.5      | EAMLKHR                               | Acetyl:2H(3) (N-term);<br>Acetyl:2H(3) (K)                   |
|    |           |                                                                               |                   |       | 527.2575  | 1052.5004 | 2 | 1052.4999 | 0.0005  | 0 | 3.1      | QQSNEHLR                              | Acetyl (N-term)                                              |



|           |           |   |           |         |   |          |                                                      |                                              |
|-----------|-----------|---|-----------|---------|---|----------|------------------------------------------------------|----------------------------------------------|
| 716.4129  | 1430.8112 | 2 | 1430.7961 | 0.0152  | 0 | 1.10E-06 | VGWEQLLTIA<br>R                                      | Acetyl:2H(3) (N-term)                        |
| 626.3029  | 1875.8869 | 3 | 1875.8713 | 0.0156  | 0 | 2.5      | MAPYQGPDAV<br>PGALDYK                                | Acetyl (N-term); Acetyl (K)                  |
| 754       | 2258.9782 | 3 | 2258.0208 | 0.9573  | 1 | 0.79     | CQKICDQWDAL<br>GSLTHSR                               | Acetyl (N-term); Acetyl (K)                  |
| 948.5508  | 2842.6307 | 3 | 2841.5428 | 1.0879  | 1 | 2.4      | VGWEQLLTIA<br>RTINEVENQILT<br>R                      | Acetyl:2H(3) (N-term)                        |
| 984.157   | 2949.4492 | 3 | 2949.4183 | 0.0309  | 0 | 7.00E-07 | VEQIAAIAQELN<br>ELDYDShNVN<br>TR                     | Acetyl:2H(3) (N-term)                        |
| 1020.5432 | 3058.6078 | 3 | 3058.6083 | -0.0005 | 1 | 1.1      | LVSIGAEIVDG<br>NAKMTLGMIW<br>TIILR                   | 2 Oxidation (M); Acetyl (N-term); Acetyl (K) |
| 1316.6401 | 3946.8985 | 3 | 3946.8393 | 0.0591  | 1 | 2.5      | MLDAEDIVNTA<br>RPDEKAIMTYV<br>SSFYHAFSGAQ<br>K       | Oxidation (M); Acetyl (N-term); 2 Acetyl (K) |
| 1420.2384 | 4257.6934 | 3 | 4256.6807 | 1.0127  | 0 | 0.97     | MVDYHAANQS<br>YQYGPSSAGNG<br>AGGGGSMGDY<br>MAQEDDWDR | Acetyl (N-term)                              |
| 1426.2367 | 4275.6883 | 3 | 4275.6944 | -0.0062 | 0 | 0.72     | MVDYHAANQS<br>YQYGPSSAGNG                            | Oxidation (M); Acetyl:2H(3) (N-term)         |

|         |           |           |   |           |         |   |          |                 |                                            |
|---------|-----------|-----------|---|-----------|---------|---|----------|-----------------|--------------------------------------------|
|         |           |           |   |           |         |   |          | AGGGGSMGDY      |                                            |
|         |           |           |   |           |         |   |          | MAQEDDWDR       |                                            |
|         | 1439.2651 | 4314.7735 | 3 | 4314.6862 | 0.0873  | 0 | 0.96     | MVDYHAANQS      | Acetyl (Protein N-term);                   |
|         |           |           |   |           |         |   |          | YQYGPSSAGNG     | Oxidation (M); Acetyl                      |
|         |           |           |   |           |         |   |          | AGGGGSMGDY      | (N-term)                                   |
|         |           |           |   |           |         |   |          | MAQEDDWDR       |                                            |
|         | 1451.2645 | 4350.7717 | 3 | 4349.6949 | 1.0768  | 0 | 0.71     | MVDYHAANQS      | Acetyl (Protein N-term);                   |
|         |           |           |   |           |         |   |          | YQYGPSSAGNG     | 3 Oxidation (M);                           |
|         |           |           |   |           |         |   |          | AGGGGSMGDY      | Acetyl:2H(3) (N-term)                      |
|         |           |           |   |           |         |   |          | MAQEDDWDR       |                                            |
| (3)15.1 | 527.2534  | 1052.4922 | 2 | 1052.4999 | -0.0077 | 0 | 2.1      | QQSNEHLR        | Acetyl (N-term)                            |
|         | 528.7685  | 1055.5224 | 2 | 1055.5187 | 0.0036  | 0 | 0.01     | QQSNEHLR        | Acetyl:2H(3) (N-term)                      |
|         | 569.3024  | 1136.5903 | 2 | 1136.5905 | -0.0002 | 0 | 0.0047   | NFITAEELR       | Acetyl:2H(3) (N-term)                      |
|         | 602.8045  | 1203.5944 | 2 | 1203.5923 | 0.0021  | 1 | 0.93     | STLPDADRER      | Acetyl:2H(3) (N-term)                      |
|         | 627.2935  | 1252.5724 | 2 | 1252.5935 | -0.0212 | 0 | 3.1      | DHALLEEQSK      | Acetyl (N-term); Acetyl<br>(K)             |
|         | 630.8556  | 1259.6966 | 2 | 1259.6953 | 0.0013  | 0 | 8.90E-05 | LASDLLEWIR      | Acetyl:2H(3) (N-term)                      |
|         | 635.3893  | 1268.7641 | 2 | 1268.7359 | 0.0282  | 1 | 1.1      | EREAILAIHK      | Acetyl:2H(3) (N-term);<br>Acetyl:2H(3) (K) |
|         | 709.4124  | 1416.8102 | 2 | 1416.8089 | 0.0013  | 0 | 0.00059  | LMLLLEVISGER    | Acetyl:2H(3) (N-term)                      |
|         | 716.4067  | 1430.7988 | 2 | 1430.7961 | 0.0027  | 0 | 8.60E-07 | VGWEQLLTIA<br>R | Acetyl:2H(3) (N-term)                      |
|         | 717.4092  | 1432.8038 | 2 | 1432.8038 | -0.0001 | 0 | 7.10E-05 | LMLLLEVISGER    | Oxidation (M);<br>Acetyl:2H(3) (N-term)    |

|    |       |                                                                                |                  |         |           |           |   |           |         |   |          |                                                |                                                                                          |
|----|-------|--------------------------------------------------------------------------------|------------------|---------|-----------|-----------|---|-----------|---------|---|----------|------------------------------------------------|------------------------------------------------------------------------------------------|
| 12 | ACTG1 | Actin,<br>cytoplasmic 2<br>OS=Homo sapiens<br>OX=9606<br>GN=ACTG1<br>PE=1 SV=1 | 47.8±16<br>(n=2) | (1)21.6 | 984.149   | 2949.4252 | 3 | 2949.4183 | 0.0069  | 0 | 6.70E-07 | VEQIAAIAQELN<br>ELDYDSDSHNVN<br>TR             | Acetyl:2H(3) (N-term)                                                                    |
|    |       |                                                                                |                  |         | 1322.3026 | 3963.886  | 3 | 3962.8343 | 1.0517  | 1 | 1.2      | MLDAEDIVNTA<br>RPDEKAIMTYV<br>SSFYHAFSGAQ<br>K | 2 Oxidation (M); Acetyl<br>(N-term); 2 Acetyl (K)                                        |
|    |       |                                                                                |                  |         | 511.2426  | 1020.4706 | 2 | 1020.4704 | 0.0002  | 0 | 5.40E-05 | AGFAGDDAPR                                     | Acetyl:2H(3) (N-term)                                                                    |
|    |       |                                                                                |                  |         | 589.2833  | 1176.552  | 2 | 1176.549  | 0.0029  | 0 | 3.70E-05 | GYSFTTTAER                                     | Acetyl:2H(3) (N-term)                                                                    |
|    |       |                                                                                |                  |         | 781.3731  | 1560.7315 | 2 | 1560.7248 | 0.0068  | 0 | 0.0069   | QEYDESGPSIVH<br>R                              | Acetyl:2H(3) (N-term)                                                                    |
|    |       |                                                                                |                  |         | 661.9649  | 1982.8728 | 3 | 1982.9084 | -0.0356 | 0 | 1.8      | EEEIAALVIDNG<br>SGMCK                          | Acetyl (Protein N-term);<br>Oxidation (M);<br>Acetyl:2H(3) (N-term);<br>Acetyl:2H(3) (K) |
|    |       |                                                                                |                  |         | 1008.797  | 3023.3692 | 3 | 3023.3311 | 0.0381  | 1 | 1.1      | MEEEEIAALVID<br>NGSGMCKAGF<br>AGDDAPR          | Oxidation (M); Acetyl<br>(N-term); Acetyl (K)                                            |
|    |       |                                                                                |                  |         |           |           |   |           |         |   |          |                                                |                                                                                          |
|    |       |                                                                                |                  |         |           |           |   |           |         |   |          |                                                |                                                                                          |
|    |       |                                                                                |                  |         |           |           |   |           |         |   |          |                                                |                                                                                          |

|         |           |           |   |           |         |   |          |                                       |                                                                                            |
|---------|-----------|-----------|---|-----------|---------|---|----------|---------------------------------------|--------------------------------------------------------------------------------------------|
|         |           |           |   |           |         |   |          | MEEEEIAALVID                          | Acetyl (Protein N-term);                                                                   |
|         | 1028.4437 | 3082.3093 | 3 | 3081.3365 | 0.9727  | 1 | 1.2      | NGSGMCKAGF                            | 2 Oxidation (M); Acetyl                                                                    |
|         |           |           |   |           |         |   |          | AGDDAPR                               | (N-term); Acetyl (K)                                                                       |
|         |           |           |   |           |         |   |          | TTGIVMDSGDG                           |                                                                                            |
|         | 1076.8763 | 3227.6071 | 3 | 3227.6364 | -0.0294 | 0 | 1.5      | VTHTVPIYEGY                           | Acetyl:2H(3) (N-term)                                                                      |
|         |           |           |   |           |         |   |          | ALPHAILR                              |                                                                                            |
| (3)44.3 | 419.2407  | 836.4669  | 2 | 836.4756  | -0.0087 | 0 | 0.72     | IAPPER                                | Acetyl (N-term)                                                                            |
|         | 511.2433  | 1020.472  | 2 | 1020.4704 | 0.0016  | 0 | 1.10E-05 | AGFAGDDAPR                            | Acetyl:2H(3) (N-term)                                                                      |
|         | 589.2837  | 1176.5529 | 2 | 1176.549  | 0.0039  | 0 | 1.20E-05 | GYSFTTTAER                            | Acetyl:2H(3) (N-term)                                                                      |
|         | 513.305   | 1536.8931 | 3 | 1536.8783 | 0.0148  | 1 | 1.6      | EITALAPSTMKI<br>K                     | Acetyl:2H(3) (N-term); 2<br>Acetyl:2H(3) (K)                                               |
|         | 781.3715  | 1560.7284 | 2 | 1560.7248 | 0.0036  | 0 | 1.80E-08 | QEYDESGPSIVH<br>R                     | Acetyl:2H(3) (N-term)                                                                      |
|         | 837.9277  | 1673.8408 | 2 | 1673.8452 | -0.0044 | 1 | 3.2      | GYSFTTTAEREI<br>VR                    | Acetyl:2H(3) (N-term)                                                                      |
|         | 918.4671  | 1834.9196 | 2 | 1834.914  | 0.0056  | 0 | 0.0021   | SYELPDGQVITI<br>GNER                  | Acetyl:2H(3) (N-term)                                                                      |
|         | 677.6276  | 2029.8609 | 3 | 2029.9091 | -0.0483 | 0 | 1.9      | YPIEHGIVTNW<br>DMEK                   | Acetyl (N-term); Acetyl<br>(K)                                                             |
|         | 1028.4451 | 3082.3135 | 3 | 3081.3365 | 0.9769  | 1 | 1.9      | MEEEEIAALVID<br>NGSGMCKAGF<br>AGDDAPR | Acetyl (Protein N-term);<br>2 Oxidation (M); Acetyl<br>(N-term); Acetyl (K)                |
|         | 1030.4872 | 3088.4398 | 3 | 3087.3742 | 1.0656  | 1 | 1.2      | MEEEEIAALVID<br>NGSGMCKAGF<br>AGDDAPR | Acetyl (Protein N-term);<br>2 Oxidation (M);<br>Acetyl:2H(3) (N-term);<br>Acetyl:2H(3) (K) |

|    |      |                                                                                                    |                   |         |           |           |   |           |        |   |          |                                        |                                                                |
|----|------|----------------------------------------------------------------------------------------------------|-------------------|---------|-----------|-----------|---|-----------|--------|---|----------|----------------------------------------|----------------------------------------------------------------|
|    |      |                                                                                                    |                   |         | 1077.2232 | 3228.6478 | 3 | 3227.6364 | 1.0113 | 0 | 3.30E-06 | TTGIVMDSGDG<br>VTHTVPIYEGY<br>ALPHAILR | Acetyl:2H(3) (N-term)                                          |
|    |      |                                                                                                    |                   |         | 1116.5455 | 3346.6147 | 3 | 3345.6163 | 0.9984 | 0 | 0.77     | MTQIMFETFNT<br>PAMYVVAIQAVL<br>SLYASGR | 3 Oxidation (M);<br>Acetyl:2H(3) (N-term)                      |
| 13 | NASP | Nuclear<br>autoantigenic<br>sperm protein<br>OS=Homo<br>sapiens<br>OX=9606<br>GN=NASP<br>PE=1 SV=2 | 27.05±12<br>(n=2) | (1)19.8 | 423.761   | 845.5074  | 2 | 845.505   | 0.0025 | 0 | 0.046    | SLLELAR                                | Acetyl:2H(3) (N-term)                                          |
|    |      |                                                                                                    |                   |         | 546.3156  | 1090.6165 | 2 | 1090.6141 | 0.0025 | 0 | 8.2      | SGNVAELALK                             | Acetyl:2H(3) (N-term);<br>Acetyl:2H(3) (K)                     |
|    |      |                                                                                                    |                   |         | 716.8607  | 1431.7068 | 2 | 1431.7033 | 0.0035 | 0 | 1.80E-06 | VQIAANEETQE<br>R                       | Acetyl:2H(3) (N-term)                                          |
|    |      |                                                                                                    |                   |         | 968.4822  | 1934.9498 | 2 | 1934.9143 | 0.0355 | 0 | 0.87     | AMESTATAAV<br>AAELVSADK                | Oxidation (M); Acetyl<br>(N-term); Acetyl (K)                  |
|    |      |                                                                                                    |                   |         | 1125.4575 | 2248.9004 | 2 | 2248.8999 | 0.0006 | 1 | 1.1      | EEQMKEGEEETE<br>GSEEDDK                | Oxidation (M);<br>Acetyl:2H(3) (N-term); 2<br>Acetyl:2H(3) (K) |
|    |      |                                                                                                    |                   |         | 835.4083  | 2503.203  | 3 | 2503.194  | 0.009  | 0 | 4.40E-07 | ATLVESSTSGFT<br>PGGGGSSVSMI<br>ASR     | Oxidation (M);<br>Acetyl:2H(3) (N-term)                        |

|         |           |           |   |           |         |   |          |             |                          |
|---------|-----------|-----------|---|-----------|---------|---|----------|-------------|--------------------------|
|         |           |           |   |           |         |   |          | SLLELARMENG | Oxidation (M);           |
|         | 1086.5244 | 3256.5514 | 3 | 3256.604  | -0.0526 | 1 | 1        | VLGNALEGVH  | Acetyl:2H(3) (N-term);   |
|         |           |           |   |           |         |   |          | VEEEEGEK    | Acetyl:2H(3) (K)         |
|         | 1090.5359 | 3268.5859 | 3 | 3268.5835 | 0.0024  | 0 | 6.00E-07 | LLAETHYQLGL | Acetyl:2H(3) (N-term);   |
|         |           |           |   |           |         |   |          | AYGYNSQYDE  | Acetyl:2H(3) (K)         |
|         |           |           |   |           |         |   |          | AVAQFSK     |                          |
|         | 1157.877  | 3470.6092 | 3 | 3469.6678 | 0.9414  | 1 | 1.3      | MAMESTATAA  | Acetyl (Protein N-term); |
|         |           |           |   |           |         |   |          | VAAELVSADKI | Oxidation (M);           |
|         |           |           |   |           |         |   |          | EDVPAPSTSAD | Acetyl:2H(3) (N-term); 2 |
|         |           |           |   |           |         |   |          | K           | Acetyl:2H(3) (K)         |
| (3)30.7 | 423.7616  | 845.5085  | 2 | 845.505   | 0.0036  | 0 | 0.011    | SLLELAR     | Acetyl:2H(3) (N-term)    |
|         | 678.3416  | 1354.6687 | 2 | 1354.698  | -0.0293 | 1 | 1.1      | AKLVPSQEETK | Acetyl (N-term); 2       |
|         |           |           |   |           |         |   |          |             | Acetyl (K)               |
|         | 716.8616  | 1431.7086 | 2 | 1431.7033 | 0.0053  | 0 | 4.50E-06 | VQIAANEETQE | Acetyl:2H(3) (N-term)    |
|         |           |           |   |           |         |   |          | R           |                          |
|         | 716.8912  | 1431.7679 | 2 | 1431.7628 | 0.005   | 0 | 0.0011   | EAQLYAAQAH  | Acetyl:2H(3) (N-term);   |
|         |           |           |   |           |         |   |          | LK          | Acetyl:2H(3) (K)         |
|         | 803.8554  | 1605.6963 | 2 | 1604.6876 | 1.0087  | 0 | 3.9      | TEEMPNDVLE  | Oxidation (M); Acetyl    |
|         |           |           |   |           |         |   |          | NK          | (N-term); Acetyl (K)     |
|         | 971.0091  | 1940.0036 | 2 | 1938.9581 | 1.0456  | 0 | 1.1      | VDLTLDWLTET | Acetyl:2H(3) (N-term);   |
|         |           |           |   |           |         |   |          | SEEAK       | Acetyl:2H(3) (K)         |
|         | 971.9884  | 1941.9622 | 2 | 1940.9519 | 1.0103  | 0 | 2.3      | AMESTATAAV  | Oxidation (M);           |
|         |           |           |   |           |         |   |          | AAELVSADK   | Acetyl:2H(3) (N-term);   |
|         |           |           |   |           |         |   |          |             | Acetyl:2H(3) (K)         |
|         | 662.324   | 1983.9503 | 3 | 1982.9625 | 0.9878  | 0 | 2.7      | AMESTATAAV  | Acetyl (Protein N-term); |
|         |           |           |   |           |         |   |          | AAELVSADK   | Oxidation (M);           |

|  |           |           |   |           |         |   |          |                                    |                                                                           |
|--|-----------|-----------|---|-----------|---------|---|----------|------------------------------------|---------------------------------------------------------------------------|
|  |           |           |   |           |         |   |          |                                    | Acetyl:2H(3) (N-term);<br>Acetyl:2H(3) (K)                                |
|  | 1037.5002 | 2072.9858 | 2 | 2071.9924 | 0.9934  | 0 | 1.4      | MAMESTATAA<br>VAAELVSADK           | Oxidation (M);<br>Acetyl:2H(3) (N-term);<br>Acetyl:2H(3) (K)              |
|  | 1055.0129 | 2108.0112 | 2 | 2107.9653 | 0.0459  | 0 | 0.21     | MAMESTATAA<br>VAAELVSADK           | Acetyl (Protein N-term);<br>Oxidation (M); Acetyl<br>(N-term); Acetyl (K) |
|  | 743.6793  | 2228.016  | 3 | 2227.0539 | 0.9621  | 0 | 1.5      | KPTDGASSSNC<br>VTDISHLVR           | Acetyl (N-term); Acetyl<br>(K)                                            |
|  | 745.3544  | 2233.0415 | 3 | 2233.077  | -0.0355 | 1 | 1.8      | MAVLNEQVKE<br>AEGSSAEYK            | Oxidation (M);<br>Acetyl:2H(3) (N-term); 2<br>Acetyl:2H(3) (K)            |
|  | 1218.6359 | 2435.2572 | 2 | 2435.2519 | 0.0054  | 0 | 0.91     | HLVMGDIPAAV<br>NAFQEAASLLG<br>K    | Acetyl (N-term); Acetyl<br>(K)                                            |
|  | 1238.0836 | 2474.1526 | 2 | 2474.1389 | 0.0137  | 0 | 0.3      | MENGVLGNAL<br>EGVHVEEEEGE<br>K     | Oxidation (M);<br>Acetyl:2H(3) (N-term);<br>Acetyl:2H(3) (K)              |
|  | 830.074   | 2487.2003 | 3 | 2487.1991 | 0.0012  | 0 | 1.90E-05 | ATLVESSTSGFT<br>PGGGGSSVSMI<br>ASR | Acetyl:2H(3) (N-term)                                                     |
|  | 835.743   | 2504.2073 | 3 | 2503.194  | 1.0133  | 0 | 0.13     | ATLVESSTSGFT<br>PGGGGSSVSMI<br>ASR | Oxidation (M);<br>Acetyl:2H(3) (N-term)                                   |

|    |           |                                                                             |                    |         |           |           |   |           |         |   |          |                                               |                                                                                            |
|----|-----------|-----------------------------------------------------------------------------|--------------------|---------|-----------|-----------|---|-----------|---------|---|----------|-----------------------------------------------|--------------------------------------------------------------------------------------------|
|    |           |                                                                             |                    |         | 1090.5384 | 3268.5934 | 3 | 3268.5835 | 0.0099  | 0 | 3.40E-08 | LLAETHYQLGL<br>AYGYNSQYDE<br>AVAQFSK          | Acetyl:2H(3) (N-term);<br>Acetyl:2H(3) (K)                                                 |
|    |           |                                                                             |                    |         | 1157.8749 | 3470.6029 | 3 | 3469.6678 | 0.9351  | 1 | 0.78     | MAMESTATAA<br>VAAELVSADKI<br>EDVPAPSTSAD<br>K | Acetyl (Protein N-term);<br>Oxidation (M);<br>Acetyl:2H(3) (N-term); 2<br>Acetyl:2H(3) (K) |
| 14 | PRDX<br>4 | Peroxioredoxin<br>-4 OS=Homo<br>sapiens<br>OX=9606<br>GN=PRDX4<br>PE=1 SV=1 | 18.54±5.2<br>(n=2) | (1)15.9 | 777.9556  | 1553.8967 | 2 | 1553.8936 | 0.0032  | 0 | 3.00E-06 | IPLLSDLTHQIS<br>K                             | Acetyl:2H(3) (N-term);<br>Acetyl:2H(3) (K)                                                 |
|    |           |                                                                             |                    |         | 835.9031  | 1669.7917 | 2 | 1668.7823 | 1.0094  | 0 | 0.00068  | DYGVYLED SGH<br>TLR                           | Acetyl:2H(3) (N-term)                                                                      |
|    |           |                                                                             |                    |         | 890.9459  | 1779.8772 | 2 | 1778.9064 | 0.9707  | 0 | 0.95     | MEALPLLAATT<br>PDHGR                          | Acetyl (Protein N-term);<br>Acetyl:2H(3) (N-term)                                          |
|    |           |                                                                             |                    | (3)26.6 | 777.9558  | 1553.8971 | 2 | 1553.8936 | 0.0036  | 0 | 6.10E-06 | IPLLSDLTHQIS<br>K                             | Acetyl:2H(3) (N-term);<br>Acetyl:2H(3) (K)                                                 |
|    |           |                                                                             |                    |         | 835.4029  | 1668.7913 | 2 | 1668.7823 | 0.009   | 0 | 2.90E-05 | DYGVYLED SGH<br>TLR                           | Acetyl:2H(3) (N-term)                                                                      |
|    |           |                                                                             |                    |         | 951.031   | 1900.0474 | 2 | 1899.0154 | 1.0321  | 1 | 6.1      | EALPLLAATTP<br>DHGRHR                         | Acetyl:2H(3) (N-term)                                                                      |
|    |           |                                                                             |                    |         | 1014.5049 | 2026.9952 | 2 | 2027.037  | -0.0418 | 1 | 3        | MEALPLLAATT<br>PDHGRHR                        | Acetyl (N-term)                                                                            |



|           |           |   |           |        |   |   |               |             |                                |
|-----------|-----------|---|-----------|--------|---|---|---------------|-------------|--------------------------------|
|           |           |   |           |        |   |   |               | GKYLVFFFYPL | Acetyl (N-term); Acetyl<br>(K) |
| 1116.2289 | 3345.6649 | 3 | 3345.6461 | 0.0188 | 1 | 1 | DFTFVCPTEIIAF |             |                                |
|           |           |   |           |        |   |   | GDR           |             |                                |

**Table S2.** Core signaling pathways with which the target proteins of baicalin are associated.

| Ingenuity Canonical Pathways                                      | -log(p-value) | Molecules (gene names)                         |
|-------------------------------------------------------------------|---------------|------------------------------------------------|
| <b>Role of PKR in Interferon Induction and Antiviral Response</b> | 5.84          | <i>HSP90AA1,HSP90AB1,HSPA1A/HSPA1B,NPM1</i>    |
| <b>PI3K/AKT Signaling</b>                                         | 5.15          | <i>HSP90AA1,HSP90AB1,YWHAQ,YWHAZ</i>           |
| <b>eNOS Signaling</b>                                             | 3.89          | <i>HSP90AA1,HSP90AB1,HSPA1A/HSPA1B</i>         |
| <b>Aldosterone Signaling in Epithelial Cells</b>                  | 3.83          | <i>HSP90AA1,HSP90AB1,HSPA1A/HSPA1B</i>         |
| <b>NRF2-mediated Oxidative Stress Response</b>                    | 3.47          | <i>ACTG1,HSP90AA1,HSP90AB1</i>                 |
| <b>Glucocorticoid Receptor Signaling</b>                          | 3.45          | <i>ATP5F1B,HSP90AA1,HSP90AB1,HSPA1A/HSPA1B</i> |
| <b>Cell Cycle: G2/M DNA Damage Checkpoint Regulation</b>          | 3.3           | <i>YWHAQ,YWHAZ</i>                             |
| <b>Protein Ubiquitination Pathway</b>                             | 3.16          | <i>HSP90AA1,HSP90AB1,HSPA1A/HSPA1B</i>         |
| <b>Mitotic Roles of Polo-Like Kinase</b>                          | 3.1           | <i>HSP90AA1,HSP90AB1</i>                       |
| <b>Remodeling of Epithelial Adherens Junctions</b>                | 3.06          | <i>ACTG1,ACTN4</i>                             |
| <b>ERK5 Signaling</b>                                             | 2.99          | <i>YWHAQ,YWHAZ</i>                             |
| <b>Hypoxia Signaling in the Cardiovascular System</b>             | 2.99          | <i>HSP90AA1,HSP90AB1</i>                       |
| <b>Xenobiotic Metabolism AHR Signaling Pathway</b>                | 2.91          | <i>HSP90AA1,HSP90AB1</i>                       |

|                                                            |      |                                  |
|------------------------------------------------------------|------|----------------------------------|
| <b>BAG2 Signaling Pathway</b>                              | 2.89 | <i>HSP90AA1,HSPA1A/HSPA1B</i>    |
| <b>HIPPO signaling</b>                                     | 2.85 | <i>YWHAQ,YWHAZ</i>               |
| <b>VEGF Signaling</b>                                      | 2.73 | <i>ACTG1,ACTN4</i>               |
| <b>Estrogen Receptor Signaling</b>                         | 2.68 | <i>ATP5F1B,HSP90AA1,HSP90AB1</i> |
| <b>Telomerase Signaling</b>                                | 2.67 | <i>HSP90AA1,HSP90AB1</i>         |
| <b>PPAR Signaling</b>                                      | 2.67 | <i>HSP90AA1,HSP90AB1</i>         |
| <b>IGF-1 Signaling</b>                                     | 2.67 | <i>YWHAQ,YWHAZ</i>               |
| <b>Paxillin Signaling</b>                                  | 2.65 | <i>ACTG1,ACTN4</i>               |
| <b>Prostate Cancer Signaling</b>                           | 2.63 | <i>HSP90AA1,HSP90AB1</i>         |
| <b>Nitric Oxide Signaling in the Cardiovascular System</b> | 2.59 | <i>HSP90AA1,HSP90AB1</i>         |
| <b>Neuregulin Signaling</b>                                | 2.59 | <i>HSP90AA1,HSP90AB1</i>         |
| <b>14-3-3-mediated Signaling</b>                           | 2.51 | <i>YWHAQ,YWHAZ</i>               |
| <b>p70S6K Signaling</b>                                    | 2.49 | <i>YWHAQ,YWHAZ</i>               |
| <b>Creatine-phosphate Biosynthesis</b>                     | 2.48 | <i>CKB</i>                       |
| <b>MSP-RON Signaling In Cancer Cells Pathway</b>           | 2.44 | <i>YWHAQ,YWHAZ</i>               |
| <b>Aryl Hydrocarbon Receptor Signaling</b>                 | 2.38 | <i>HSP90AA1,HSP90AB1</i>         |
| <b>Epithelial Adherens Junction Signaling</b>              | 2.33 | <i>ACTG1,ACTN4</i>               |
| <b>Inhibition of ARE-Mediated mRNA Degradation Pathway</b> | 2.31 | <i>YWHAQ,YWHAZ</i>               |
| <b>Germ Cell-Sertoli Cell Junction Signaling</b>           | 2.27 | <i>ACTG1,ACTN4</i>               |
| <b>Xenobiotic Metabolism CAR Signaling Pathway</b>         | 2.25 | <i>HSP90AA1,HSP90AB1</i>         |
| <b>Xenobiotic Metabolism PXR</b>                           | 2.22 | <i>HSP90AA1,HSP90AB1</i>         |

| Signaling Pathway                      |      |                               |
|----------------------------------------|------|-------------------------------|
| IL-17 Signaling                        | 2.21 | <i>HSP90AA1,HSP90AB1</i>      |
| PPAR $\alpha$ /RXR $\alpha$ Activation | 2.2  | <i>HSP90AA1,HSP90AB1</i>      |
| Leukocyte Extravasation                | 2.16 | <i>ACTG1,ACTN4</i>            |
| Signaling                              |      |                               |
| ILK Signaling                          | 2.15 | <i>ACTG1,ACTN4</i>            |
| Sertoli Cell-Sertoli Cell              | 2.11 | <i>ACTG1,ACTN4</i>            |
| Junction Signaling                     |      |                               |
| HIF1 $\alpha$ Signaling                | 2.1  | <i>HSP90AA1,HSPA1A/HSPA1B</i> |
| Integrin Signaling                     | 2.1  | <i>ACTG1,ACTN4</i>            |
| ERK/MAPK Signaling                     | 2.06 | <i>YWHAQ,YWHAZ</i>            |
| Actin Cytoskeleton Signaling           | 1.96 | <i>ACTG1,ACTN4</i>            |
| Th17 Activation Pathway                | 1.9  | <i>HSP90AA1,HSP90AB1</i>      |
| Xenobiotic Metabolism                  | 1.86 | <i>HSP90AA1,HSP90AB1</i>      |
| Signaling                              |      |                               |
| Huntington's Disease Signaling         | 1.85 | <i>ATP5F1B,HSPA1A/HSPA1B</i>  |
| Role of p14/p19ARF in Tumor            | 1.73 | <i>NPM1</i>                   |
| Suppression                            |      |                               |
| Complement System                      | 1.62 | <i>CIQBP</i>                  |
| Protein Kinase A Signaling             | 1.57 | <i>YWHAQ,YWHAZ</i>            |
| Mechanisms of Viral Exit from          | 1.57 | <i>ACTG1</i>                  |
| Host Cells                             |      |                               |
| MSP-RON Signaling Pathway              | 1.42 | <i>ACTG1</i>                  |
| Agrin Interactions at                  | 1.35 | <i>ACTG1</i>                  |
| Neuromuscular Junction                 |      |                               |
| Caveolar-mediated Endocytosis          | 1.31 | <i>ACTG1</i>                  |
| Signaling                              |      |                               |

**Table S3.** Diseases and functions with which the target proteins of baicalin are associated.

| Category                                      | p-value  | Molecules (Gene names)                                                            |
|-----------------------------------------------|----------|-----------------------------------------------------------------------------------|
| <b>Cancer</b>                                 | 5.41E-07 | <i>ACTG1,ACTN4,HSP90AA1,HSP90AB1,HSPA1A/HSPA1B,NASP</i>                           |
| <b>Organismal Injury and Abnormalities</b>    | 5.41E-07 | <i>ACTG1,ACTN4,HSP90AA1,HSP90AB1,HSPA1A/HSPA1B,NASP</i>                           |
| <b>Renal and Urological Disease</b>           | 5.41E-07 | <i>HSP90AA1,HSP90AB1,HSPA1A/HSPA1B</i>                                            |
| <b>Reproductive System Disease</b>            | 8.58E-07 | <i>ACTG1,ACTN4,HSP90AA1,HSP90AB1,HSPA1A/HSPA1B,NASP</i>                           |
| <b>Connective Tissue Disorders</b>            | 1.24E-06 | <i>HSP90AA1,HSP90AB1</i>                                                          |
| <b>Endocrine System Disorders</b>             | 1.24E-06 | <i>HSP90AA1,HSP90AB1,NASP</i>                                                     |
| <b>Gastrointestinal Disease</b>               | 1.24E-06 | <i>HSP90AA1,HSP90AB1</i>                                                          |
| <b>Hepatic System Disease</b>                 | 1.24E-06 | <i>HSP90AA1,HSP90AB1</i>                                                          |
| <b>Respiratory Disease</b>                    | 1.24E-06 | <i>HSP90AA1,HSP90AB1</i>                                                          |
| <b>Skeletal and Muscular Disorders</b>        | 1.24E-06 | <i>HSP90AA1,HSP90AB1</i>                                                          |
| <b>Immunological Disease</b>                  | 2.48E-06 | <i>ACTG1,HSP90AA1,HSP90AB1</i>                                                    |
| <b>Developmental Disorder</b>                 | 4.14E-06 | <i>HSP90AA1,HSP90AB1</i>                                                          |
| <b>Dermatological Diseases and Conditions</b> | 6.20E-06 | <i>HSP90AA1,HSP90AB1</i>                                                          |
| <b>Tumor Morphology</b>                       | 6.20E-06 | <i>HSP90AA1,HSP90AB1</i>                                                          |
| <b>Hematological Disease</b>                  | 1.16E-05 | <i>ACTG1,HSP90AA1,HSP90AB1</i>                                                    |
| <b>Neurological Disease</b>                   | 1.16E-05 | <i>HSP90AA1,HSP90AB1</i>                                                          |
| <b>Auditory Disease</b>                       | 2.27E-05 | <i>HSP90AA1,HSP90AB1</i>                                                          |
| <b>Cellular Movement</b>                      | 2.87E-05 | <i>ACTG1,ACTN4,ATP5F1B,C1QBP,HSP90AA1,HSP90AB1,HSPA1A/HSPA1B,NPM1,YWHAQ,YWHAZ</i> |
| <b>Post-Translational Modification</b>        | 4.33E-05 | <i>HSP90AA1,HSPA1A/HSPA1B</i>                                                     |
| <b>Protein Folding</b>                        | 4.33E-05 | <i>HSP90AA1,HSPA1A/HSPA1B</i>                                                     |

|                              |          |                                                         |
|------------------------------|----------|---------------------------------------------------------|
| <b>Cellular Compromise</b>   | 4.55E-05 | <i>ACTN4,HSP90AA1,HSP90AB1,HSPA1A/HSP<br/>A1B,PRDX4</i> |
| <b>Inflammatory Response</b> | 4.55E-05 | <i>ACTN4,HSP90AA1,HSP90AB1,HSPA1A/HSP<br/>A1B,PRDX4</i> |
| <b>Infectious Diseases</b>   | 7.04E-05 | <i>HSP90AA1,HSP90AB1</i>                                |
| <b>Ophthalmic Disease</b>    | 7.82E-05 | <i>HSP90AA1,HSP90AB1</i>                                |
